# Supplementary material for: Synthesis of Non-Aromatic Pyrroles Based on the Reaction of Carbonyl Derivatives of Acetylene with 3,3-Diaminoacrylonitriles
Source: MDPI journal article supplement (doi:10.3390/molecules28083576), 2023-04-19

**Synthesis of Non-Aromatic Pyrroles Based on the Reaction of Carbonyl Derivatives of  
Acetylene with 3,3-Diaminoacrylonitriles**

Pavel S. Silaichev, Lidia N. Dianova, Tetyana V. Beryozkina, Vera S. Berseneva, Andrey N.  
Maslivets, Vasiliy A. Bakulev

Table of Contents

|                                      |     |
|--------------------------------------|-----|
| NMR spectra of compounds <b>4a-g</b> | S2  |
| NMR spectra of compounds <b>5a-f</b> | S11 |
| NMR spectra of compounds <b>6a-g</b> | S17 |
| NMR spectra of compounds <b>7a,b</b> | S26 |

**Figure S1.**  $^1\text{H}$  NMR spectrum ( $\text{DMSO-}d_6$ ) of **4a**

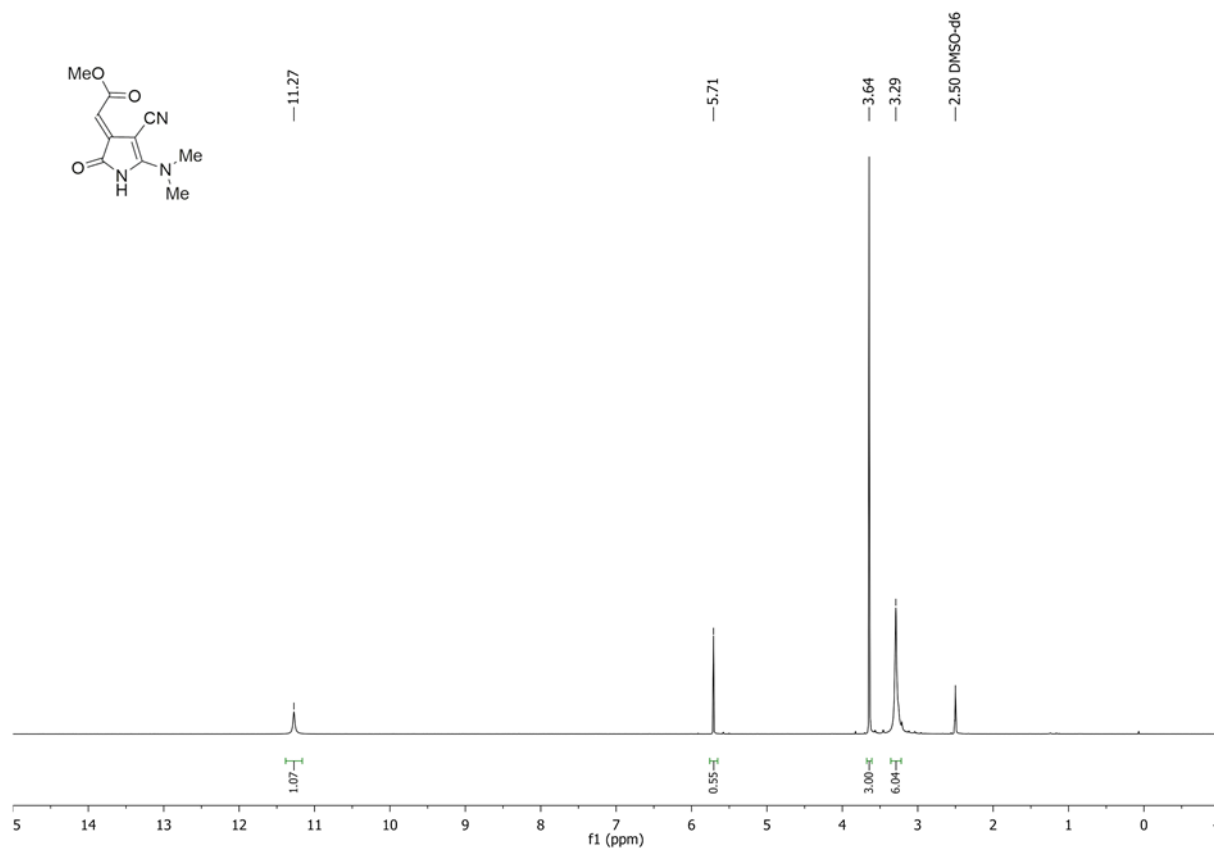

**Figure S2.**  $^{13}\text{C}$  NMR spectrum ( $\text{DMSO-}d_6$ ) of **4a**

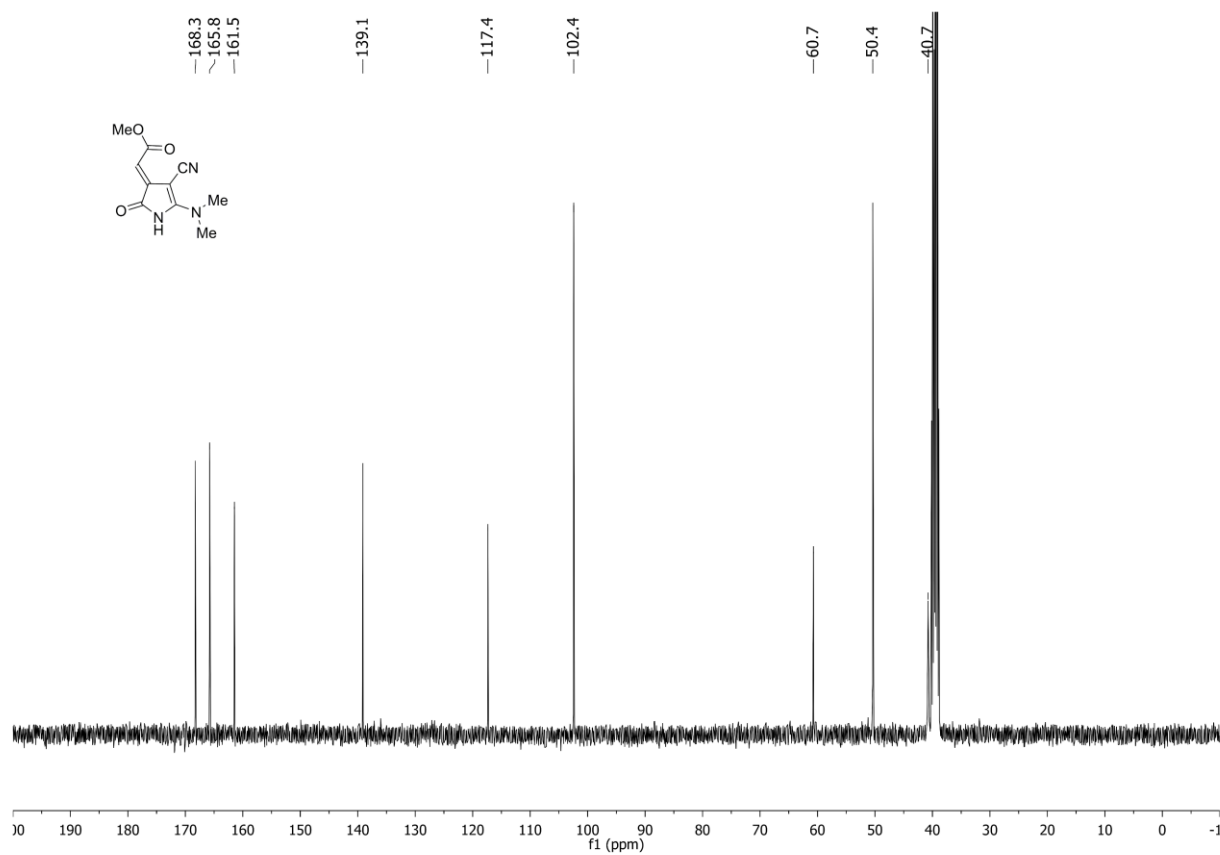

**Figure S3.**  $^1\text{H}$ - $^{13}\text{C}$  HSQC spectrum of **4a**

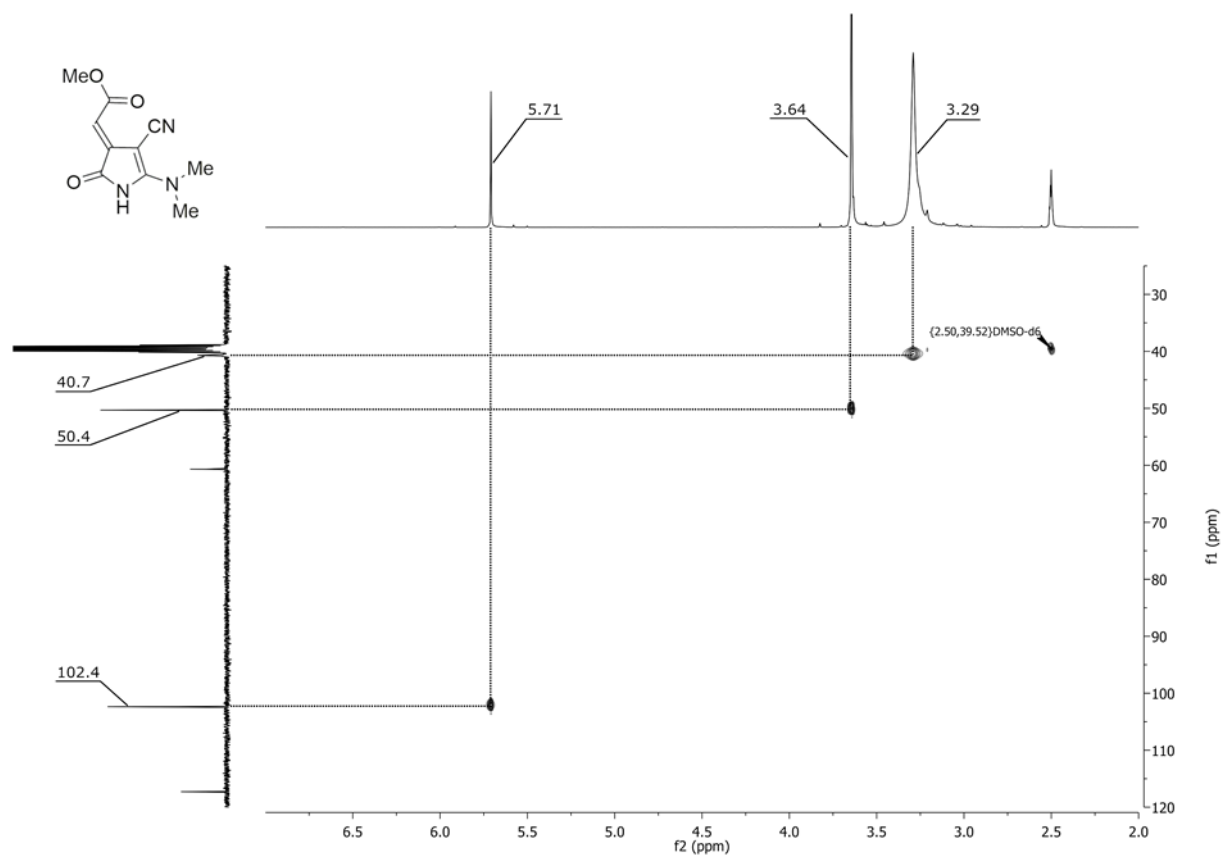

**Figure S4.**  $^1\text{H}$  NMR spectrum ( $\text{DMSO-}d_6$ ) of **4b**

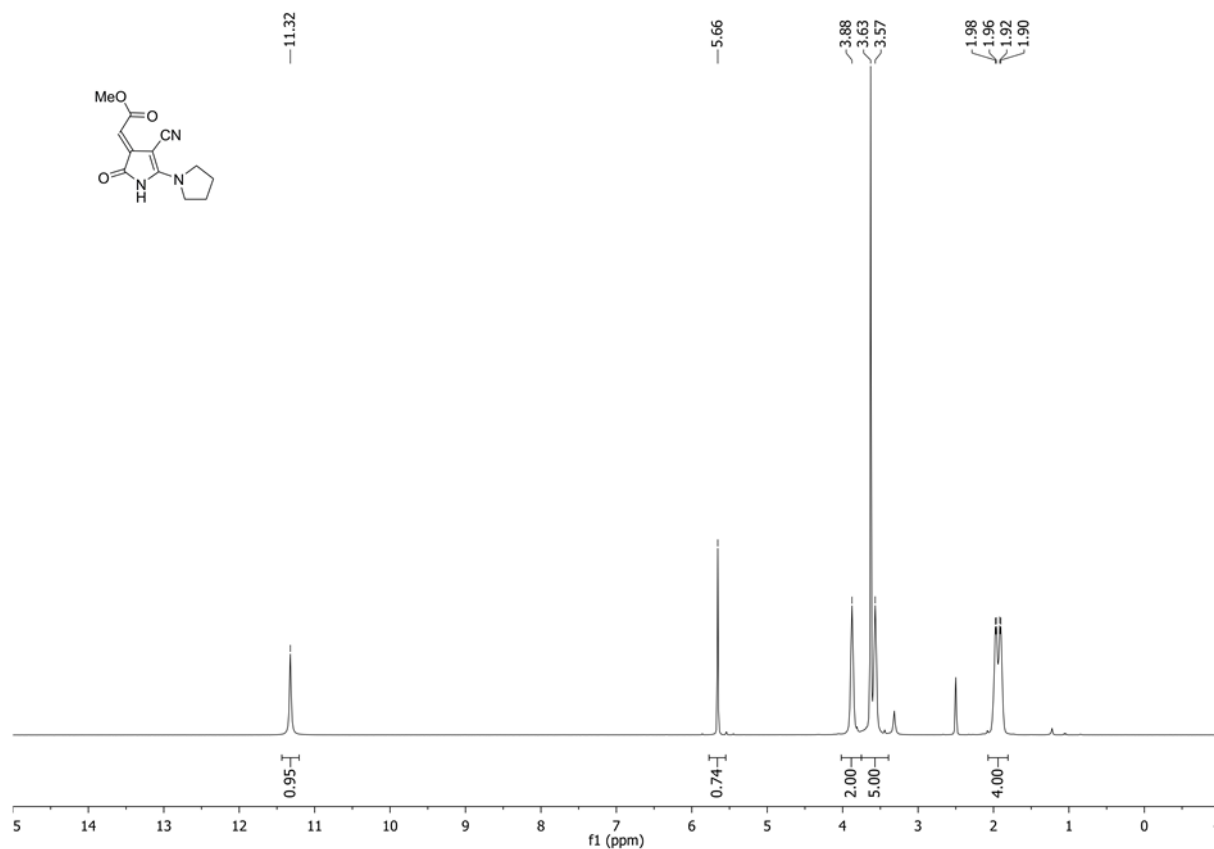

**Figure S5.**  $^{13}\text{C}$  NMR spectrum ( $\text{DMSO-}d_6$ ) of **4b**

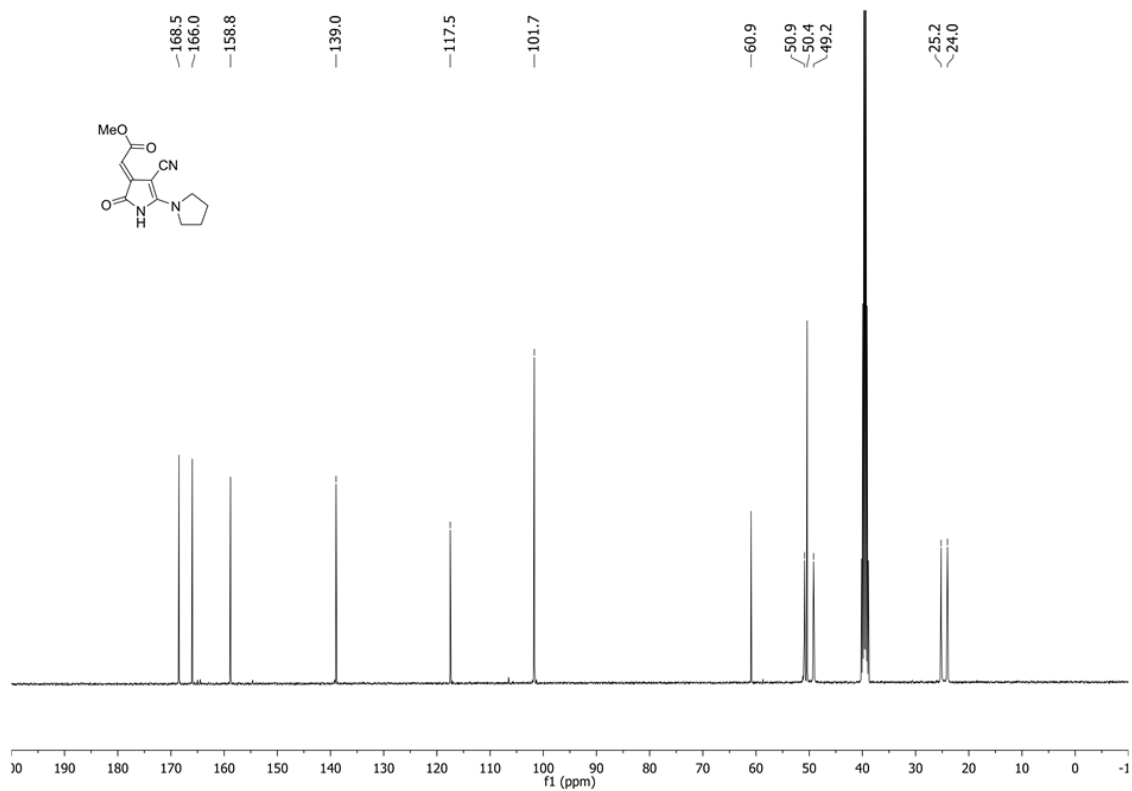

**Figure S6.**  $^1\text{H}$ - $^{13}\text{C}$  HSQC spectrum of **4b**

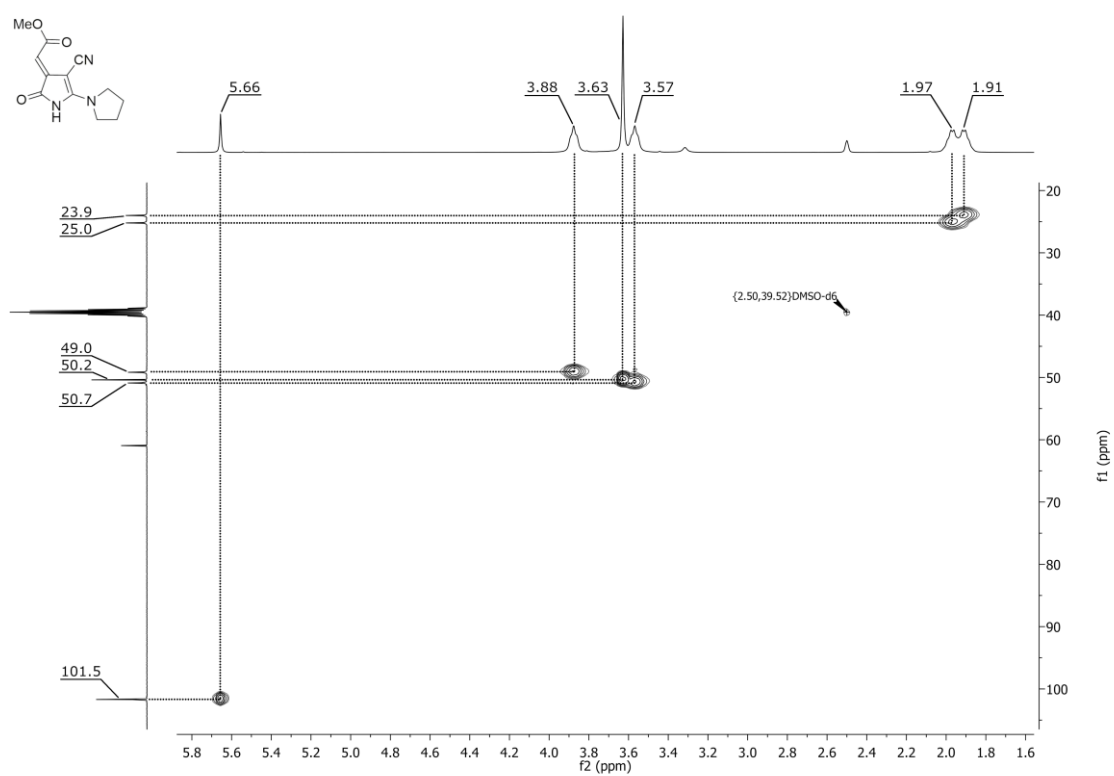

**Figure S7.**  $^1\text{H}$ - $^{13}\text{C}$  HMBC spectrum of **4b**

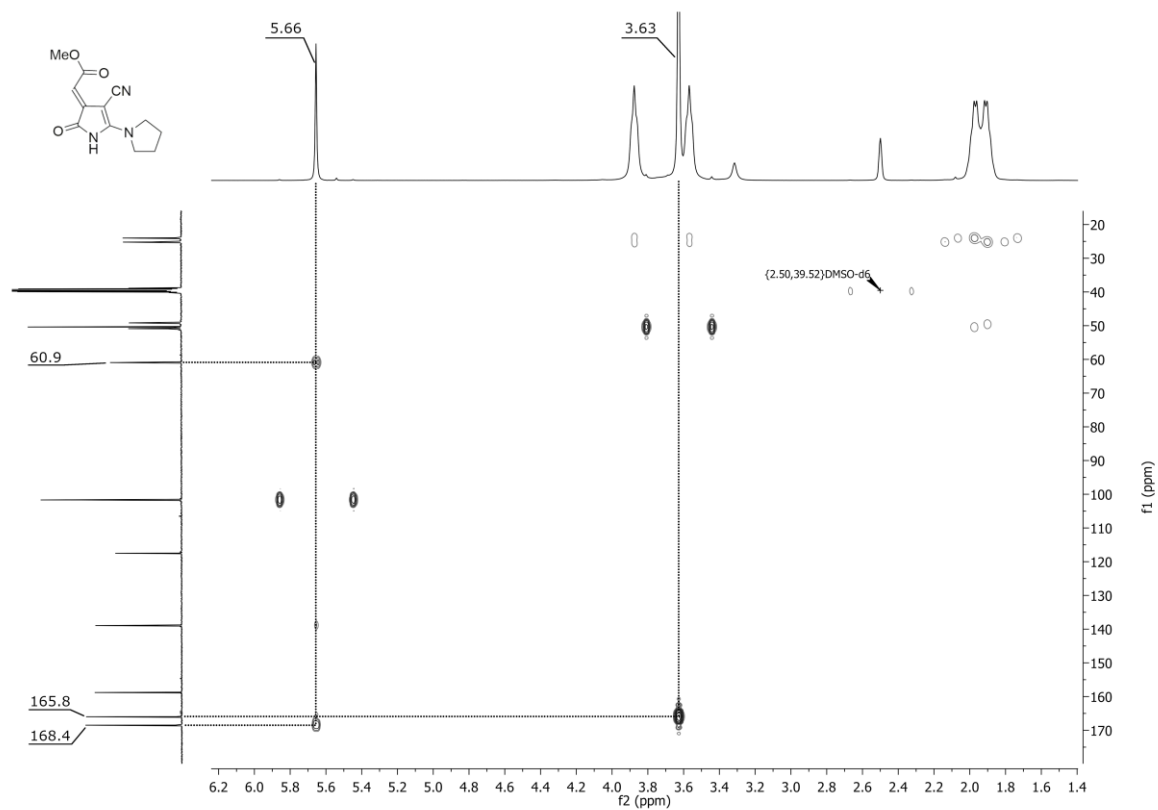

**Figure S8.**  $^1\text{H}$  NMR spectrum ( $\text{DMSO}-d_6$ ) of **4c**

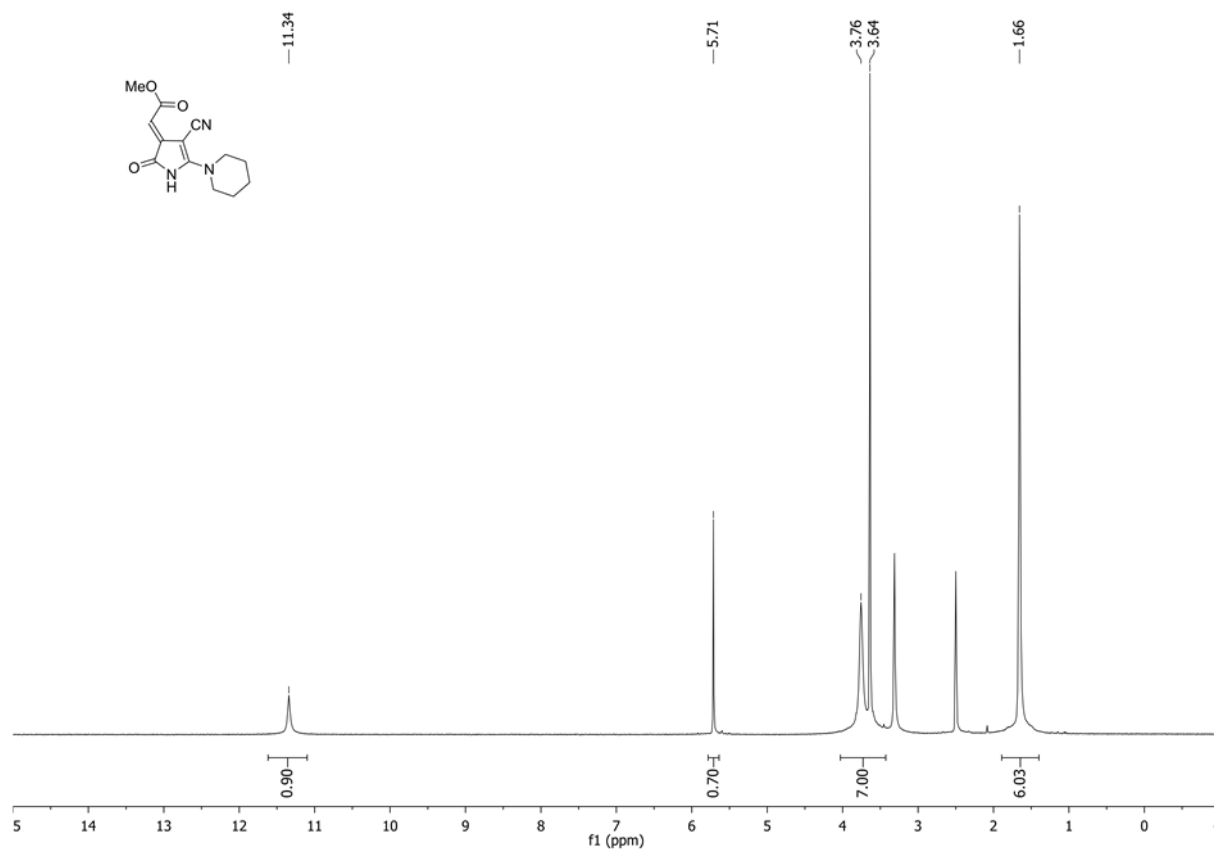

**Figure S9.**  $^{13}\text{C}$  NMR spectrum ( $\text{DMSO}-d_6$ ) of **4c**

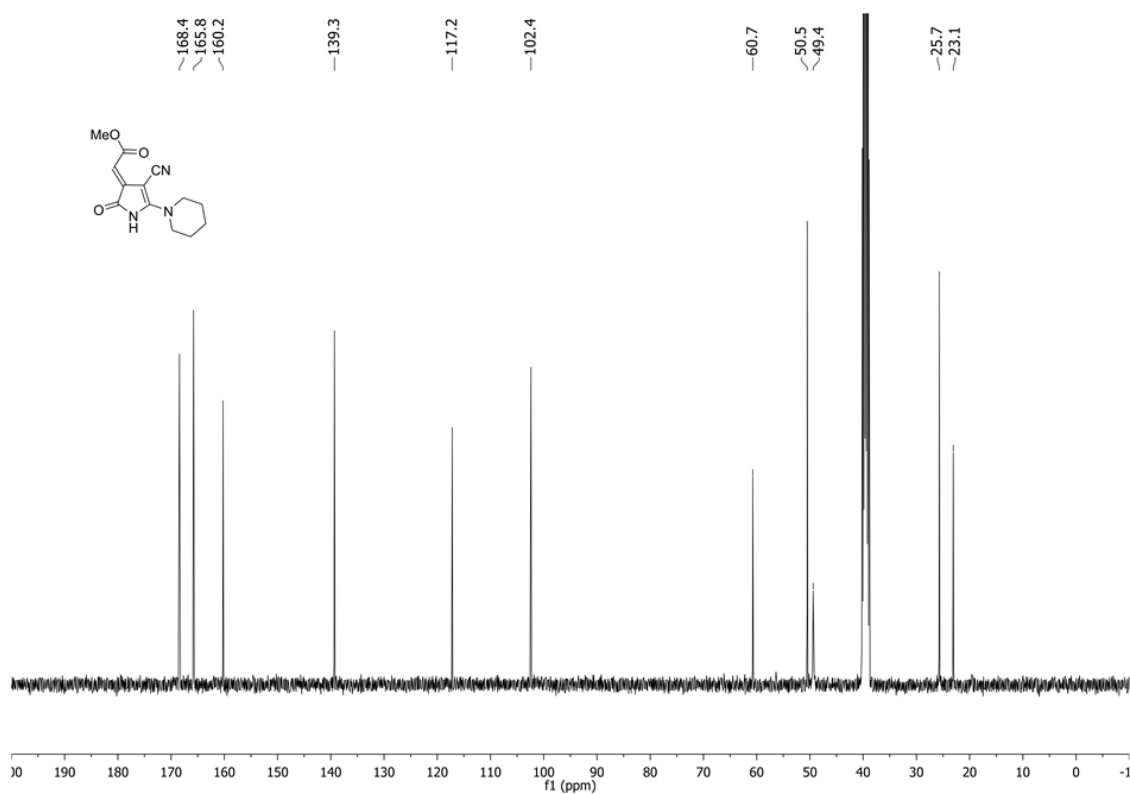

**Figure S10.**  $^1\text{H}$  NMR spectrum ( $\text{DMSO}-d_6$ ) of **4d**

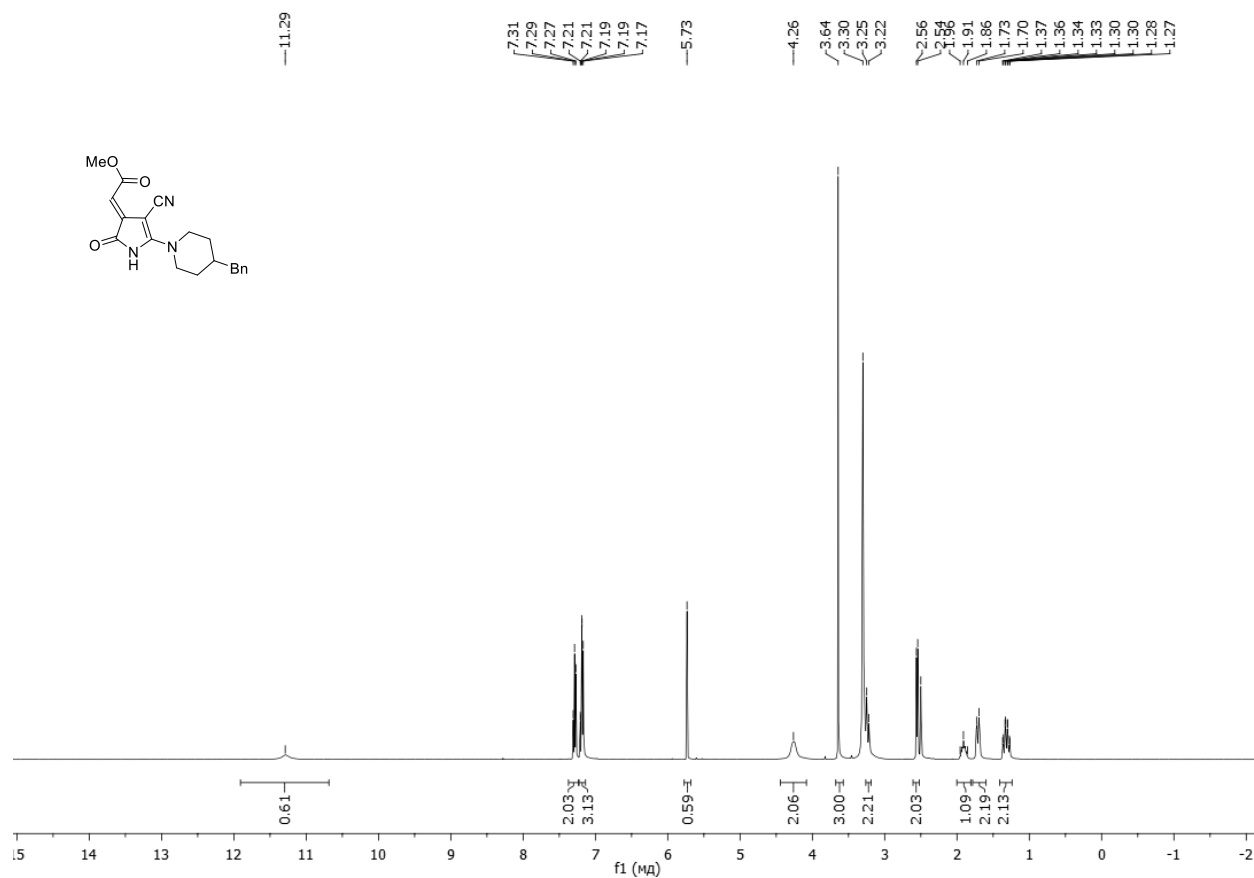

**Figure S11.**  $^{13}\text{C}$  NMR spectrum ( $\text{DMSO}-d_6$ ) of **4d**

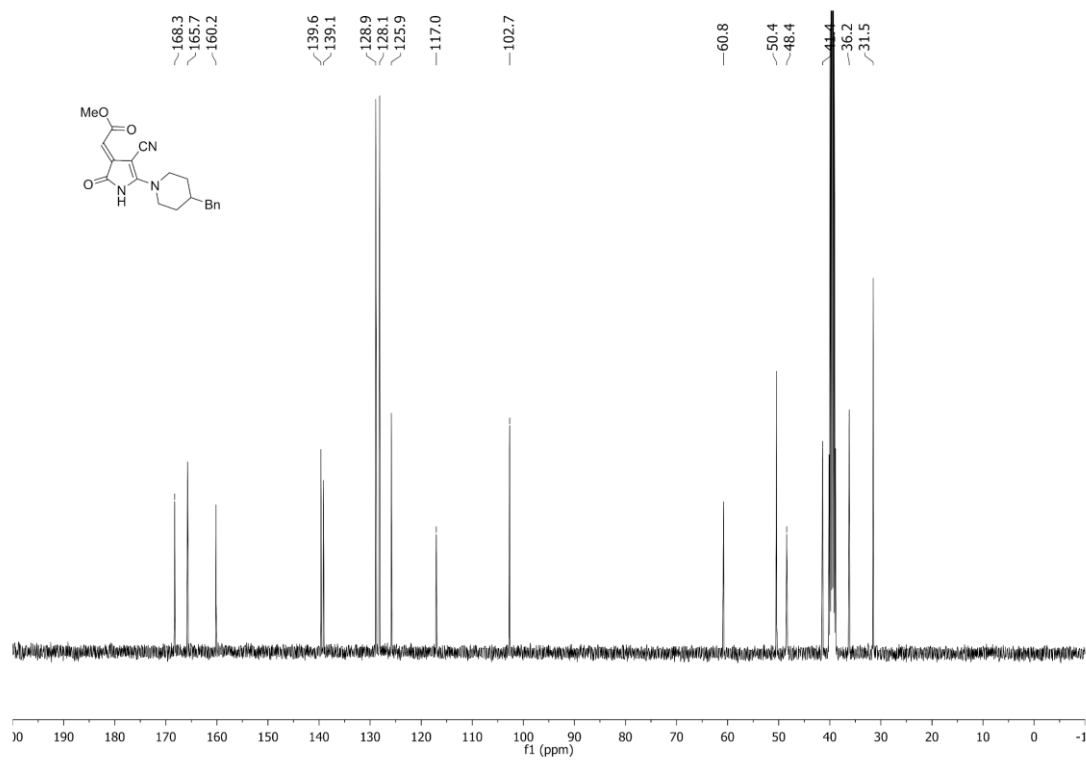

**Figure S12.**  $^1\text{H}$  NMR spectrum ( $\text{DMSO}-d_6$ ) of **4e**

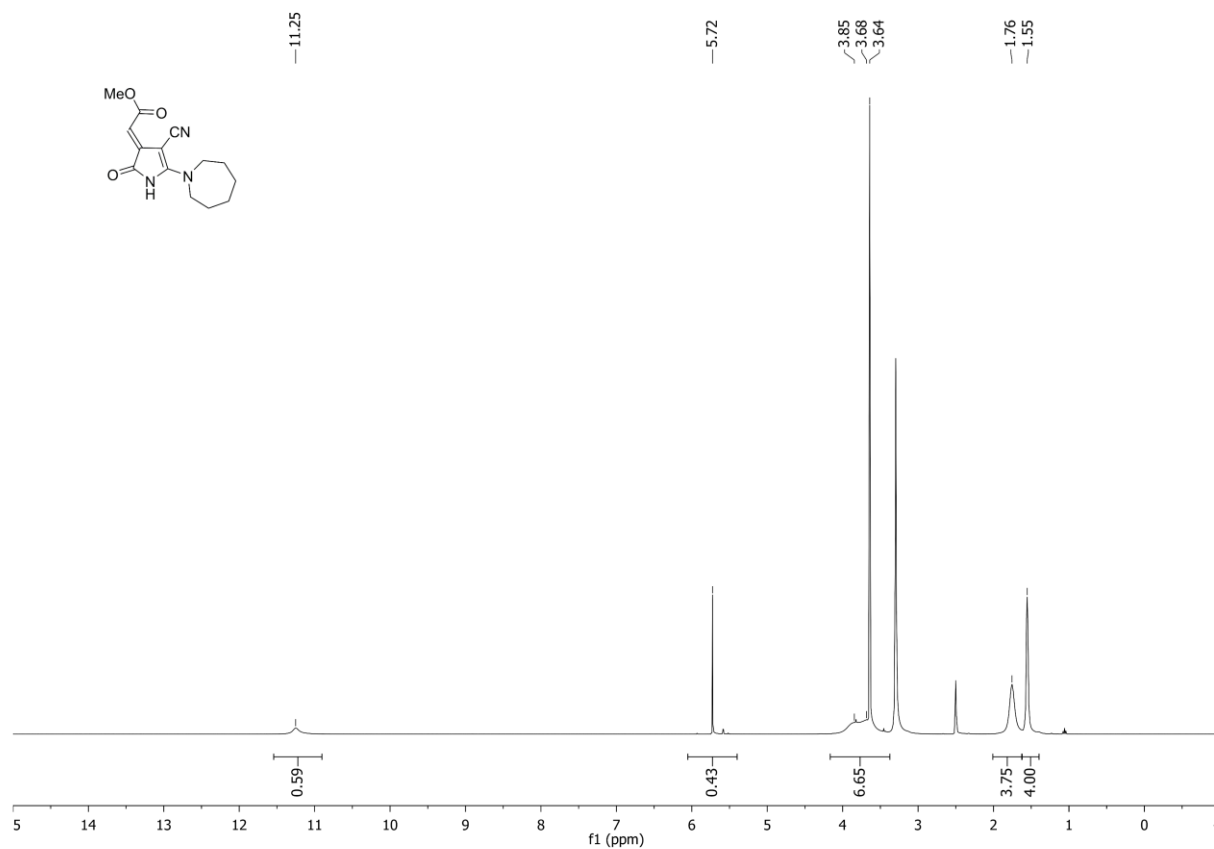

**Figure S13.**  $^{13}\text{C}$  NMR spectrum ( $\text{DMSO}-d_6$ ) of **4e**

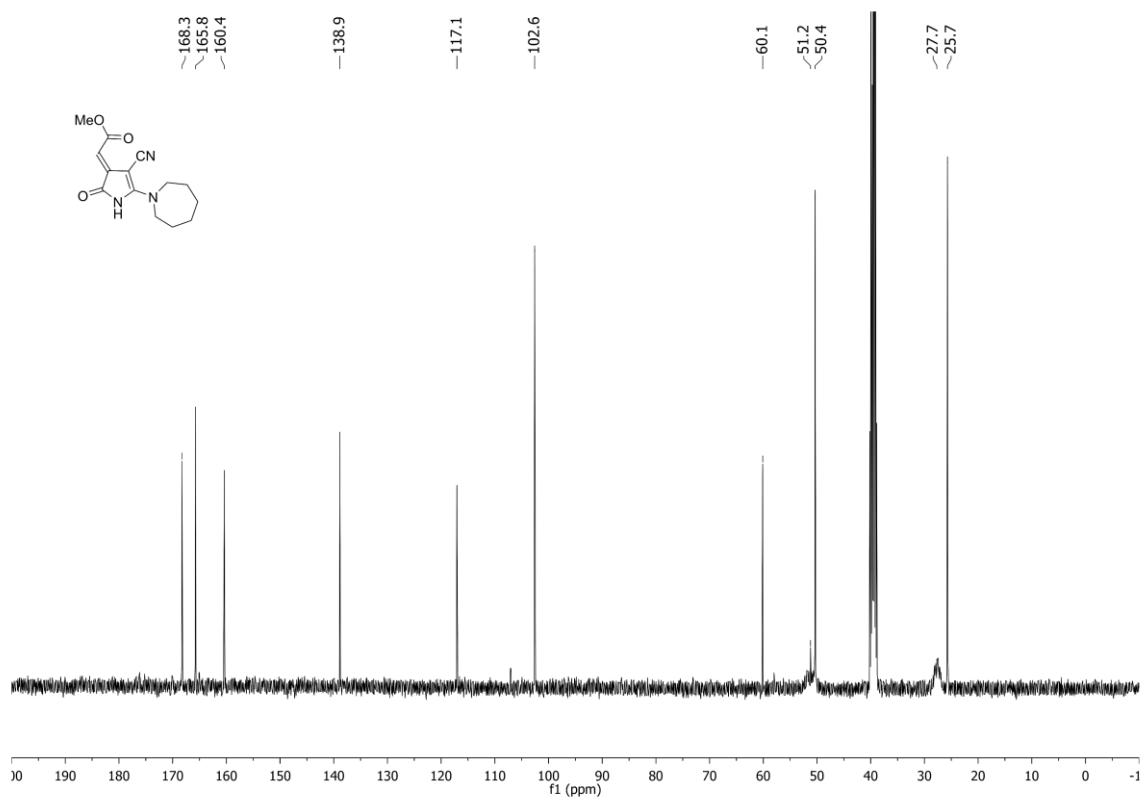



**Figure S14.**  $^1\text{H}$  NMR spectrum ( $\text{DMSO}-d_6$ ) of **4f**

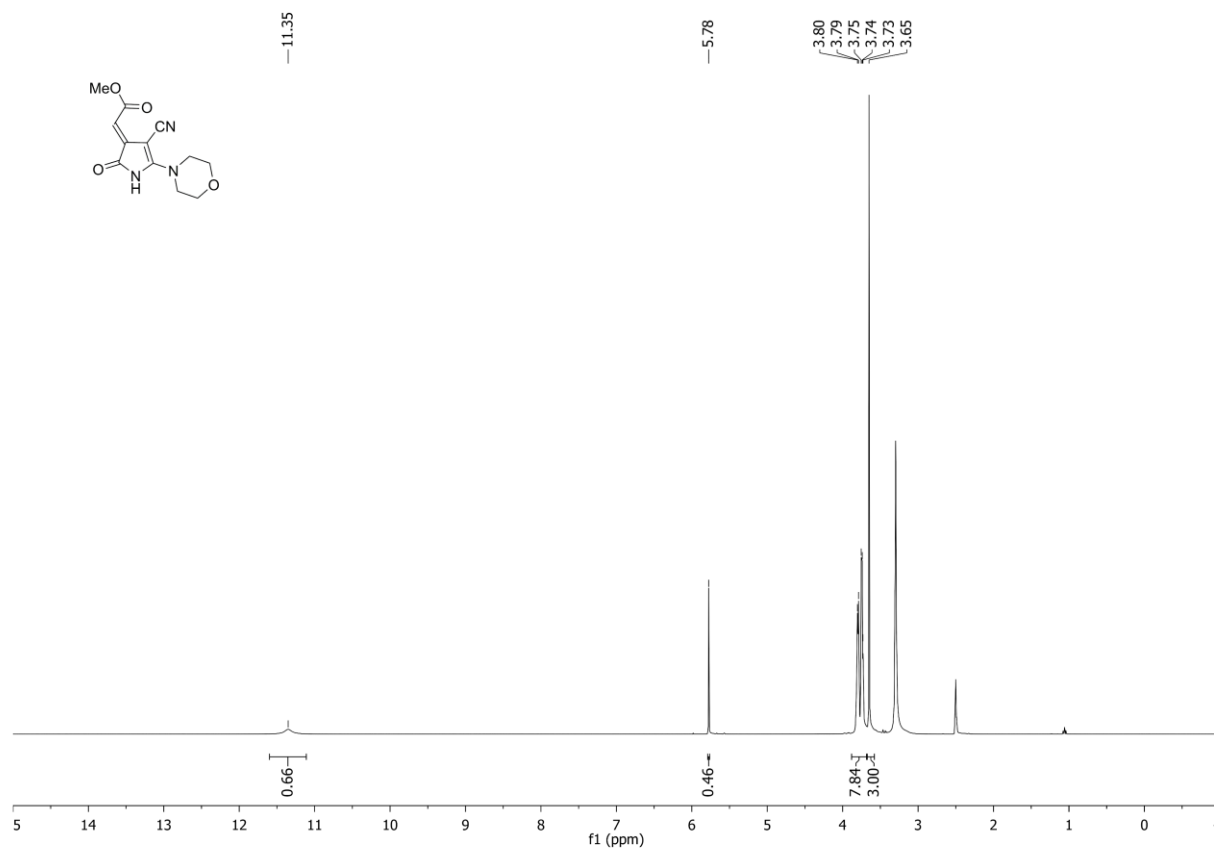

**Figure S15.**  $^{13}\text{C}$  NMR spectrum ( $\text{DMSO}-d_6$ ) of **4f**

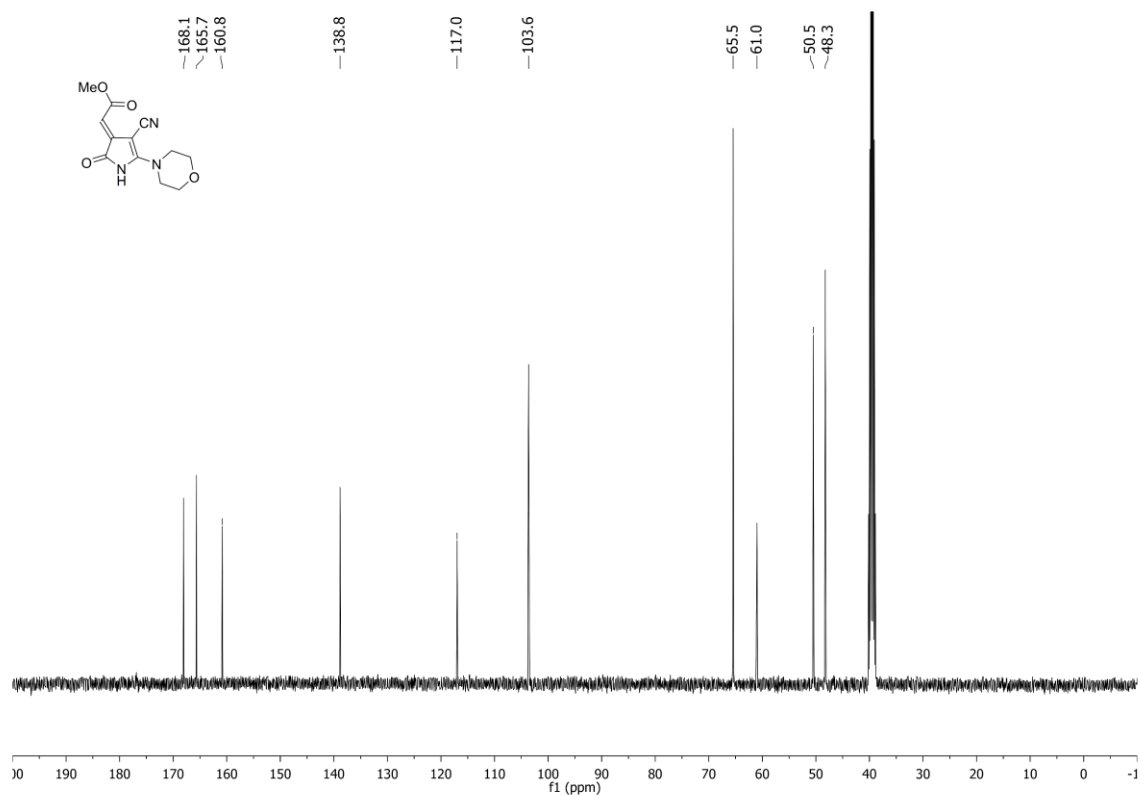

**Figure S16.**  $^1\text{H}$  NMR spectrum ( $\text{DMSO}-d_6$ ) of **4g**

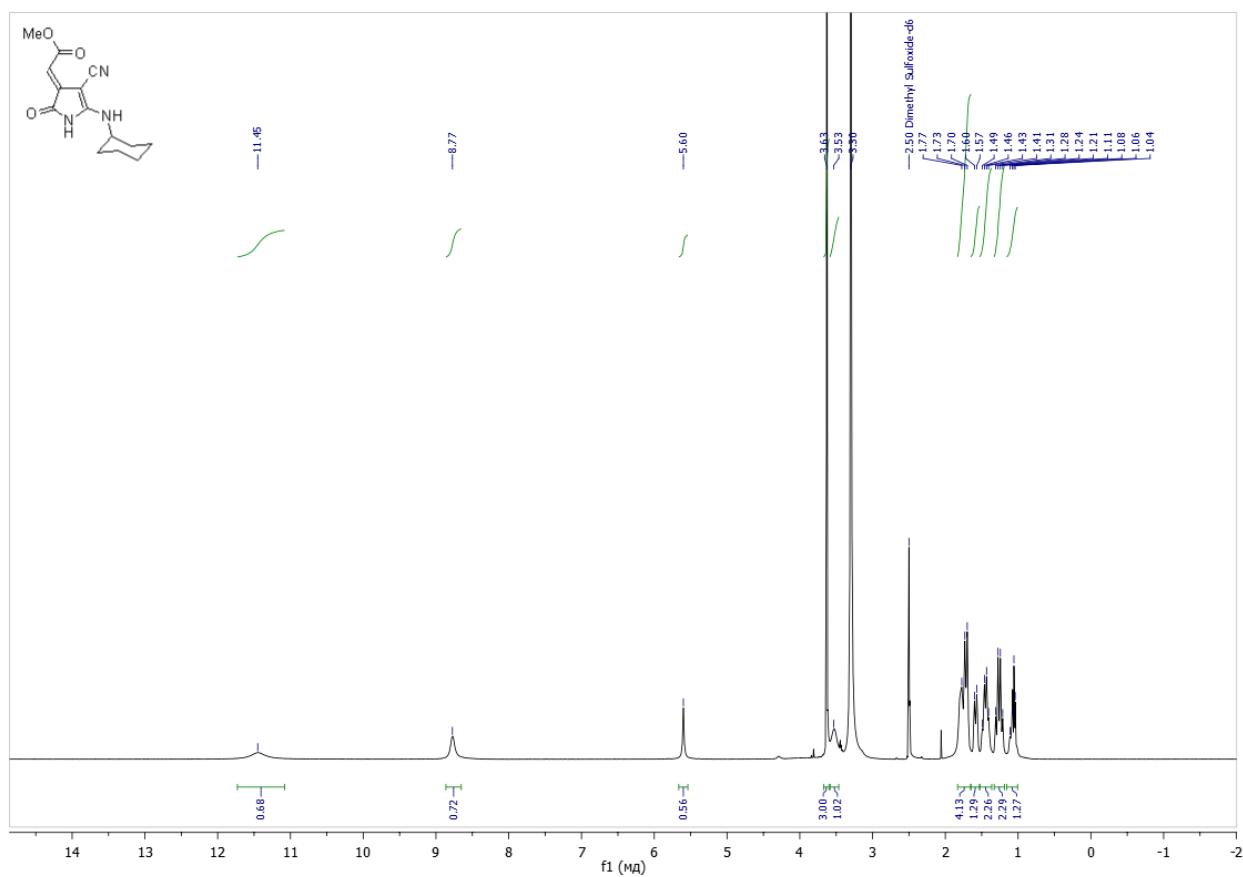

**Figure S17.**  $^{13}\text{C}$  NMR spectrum ( $\text{DMSO}-d_6$ ) of **4g**

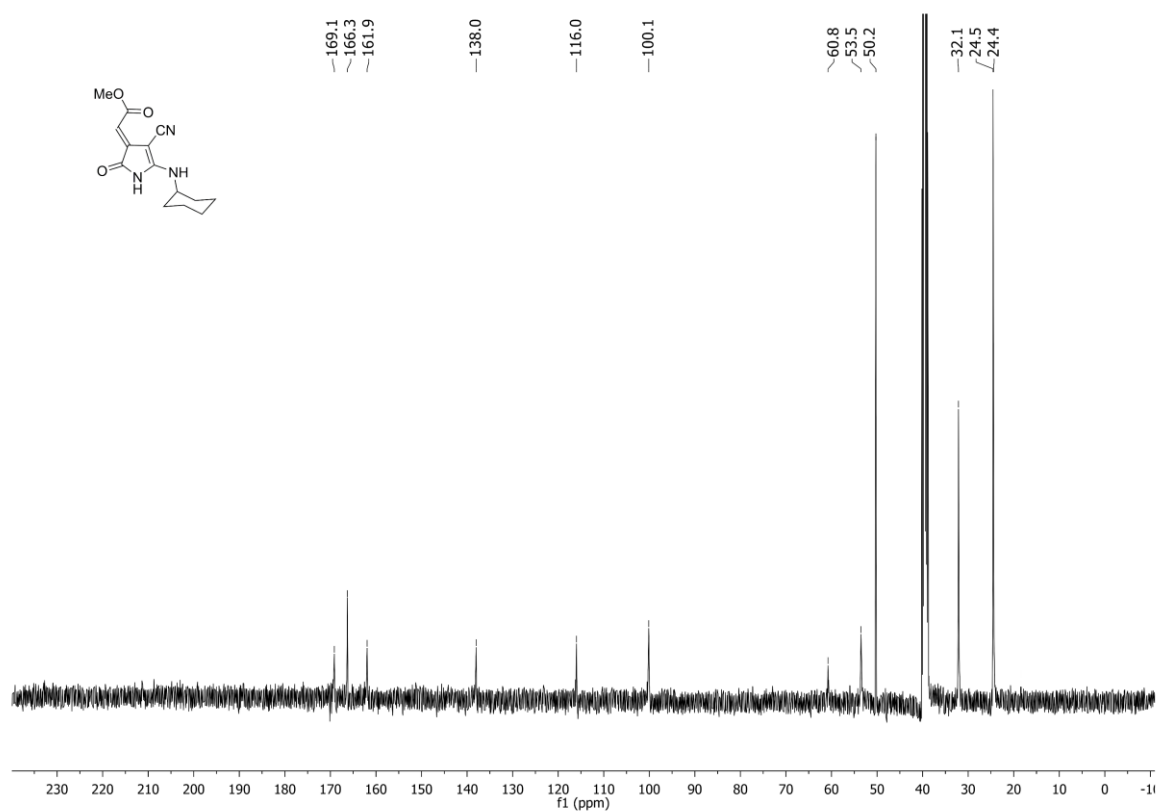

**Figure S18.**  $^1\text{H}$  NMR spectrum ( $\text{DMSO}-d_6$ ) of **5a**

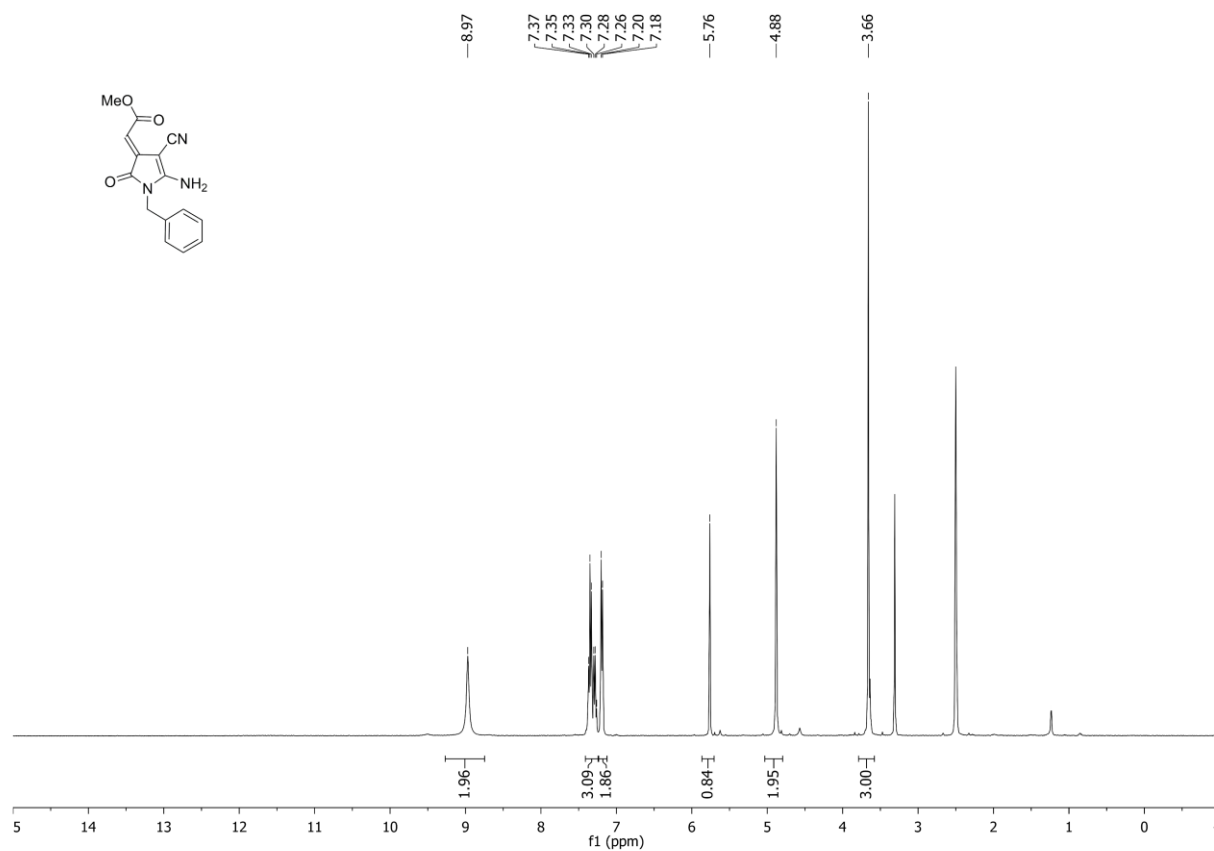

**Figure S19.**  $^{13}\text{C}$  NMR spectrum ( $\text{DMSO}-d_6$ ) of **5a**

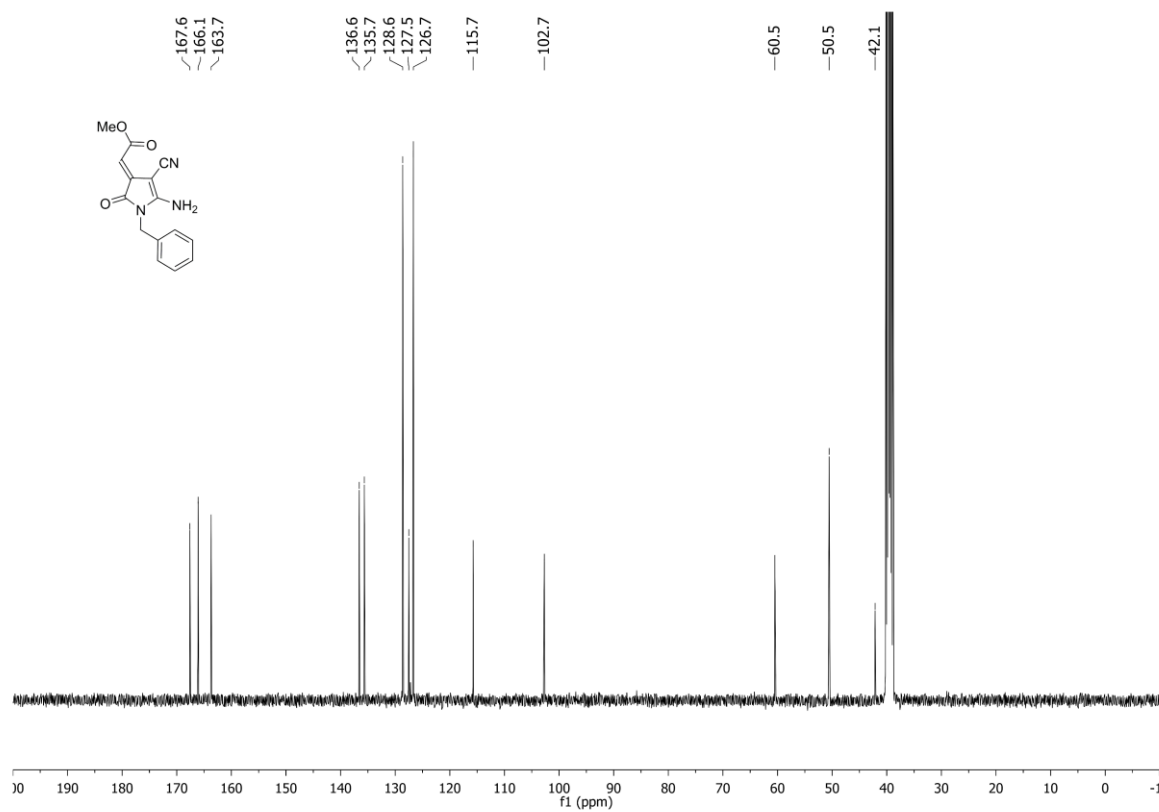

**Figure S20.**  $^1\text{H}$ - $^{13}\text{C}$  HSQC spectrum (DMSO- $d_6$ ) of **5a**

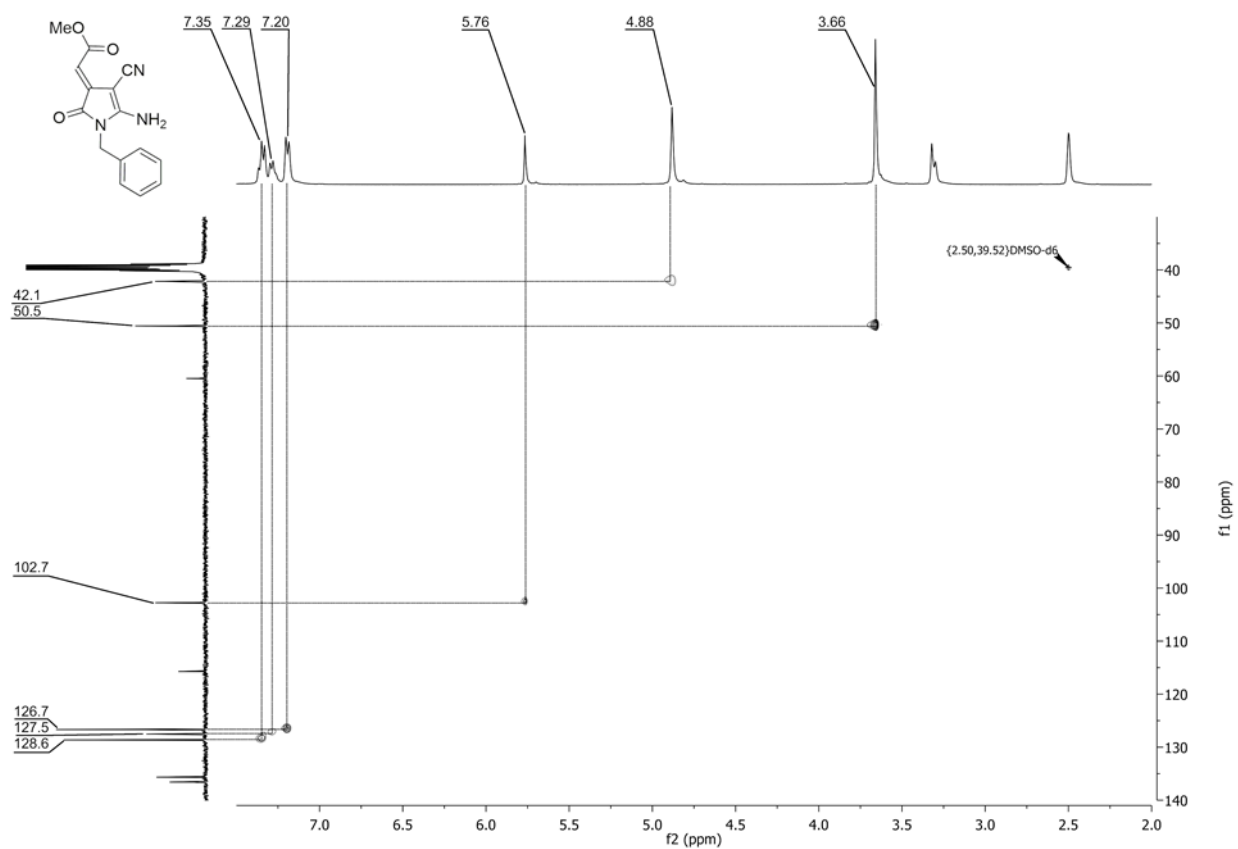

**Figure S21.**  $^1\text{H}$ - $^{13}\text{C}$  HMBC spectrum (DMSO- $d_6$ ) of **5a**

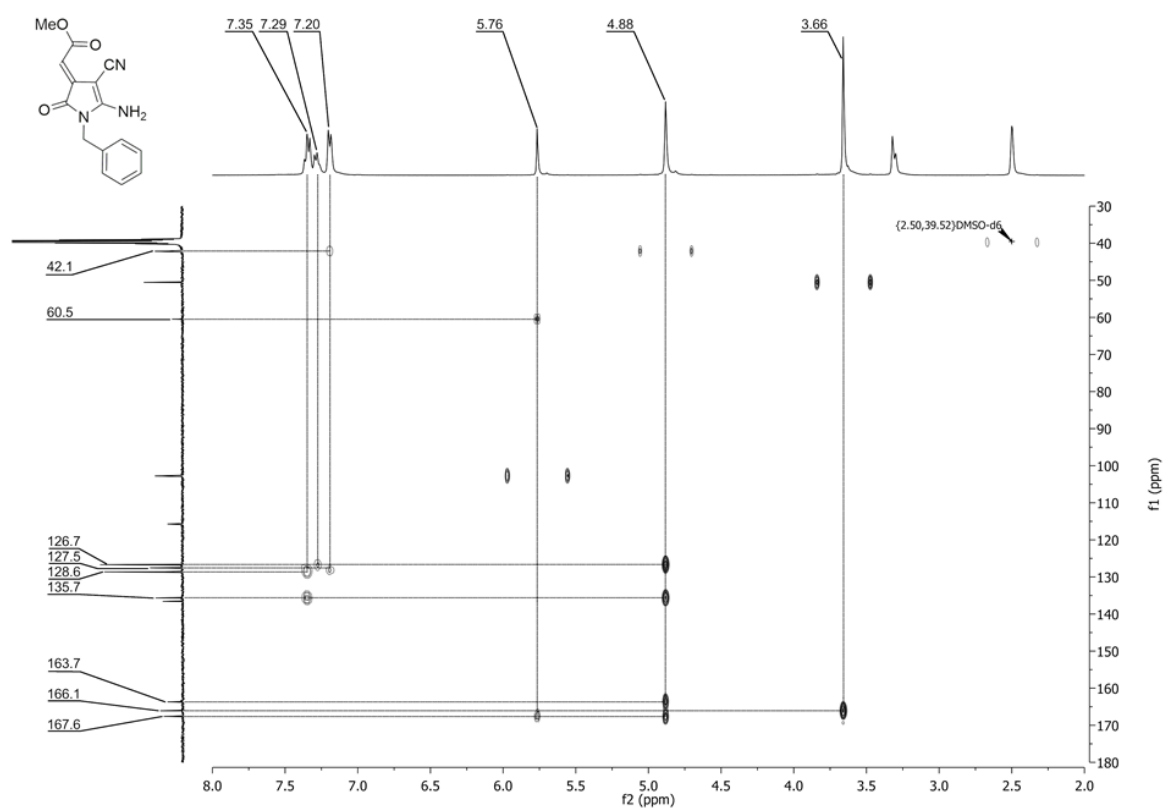

Chemical structure of compound 10: COC(=O)C1=C(C#N)C(N)=C1CNc2ccc(F)cc2

<sup>1</sup>H NMR spectrum (CDCl<sub>3</sub>) of compound 10. The spectrum shows peaks at 8.97 (s, 1H), 7.29-7.03 (m, 5H), 5.74 (s, 2H), 4.89 (s, 2H), 3.66 (s, 3H), and 2.86 (s, 2H). Integration values are provided below the peaks: 1.99, 0.97, 0.95, 0.90, 0.88, 2.00, and 3.00.

COC(=O)C(=C1C(=O)N(C1Cc2ccc(F)c(F)c2)C(=O)N)C#N

167.4, 166.1, 163.6, 163.0, 162.9, 161.1, 160.9, 160.5, 160.4, 158.6, 158.5, 136.5, 129.4, 129.4, 129.3, 129.3, 119.0, 119.0, 118.9, 118.8, 115.7, 111.6, 111.6, 111.4, 111.4, 111.4, 104.3, 104.1, 103.8, 102.7, 60.7, 50.5, 37.1, 37.0

**Figure S24.**  $^1\text{H}$  NMR spectrum ( $\text{DMSO}-d_6$ ) of **5c**

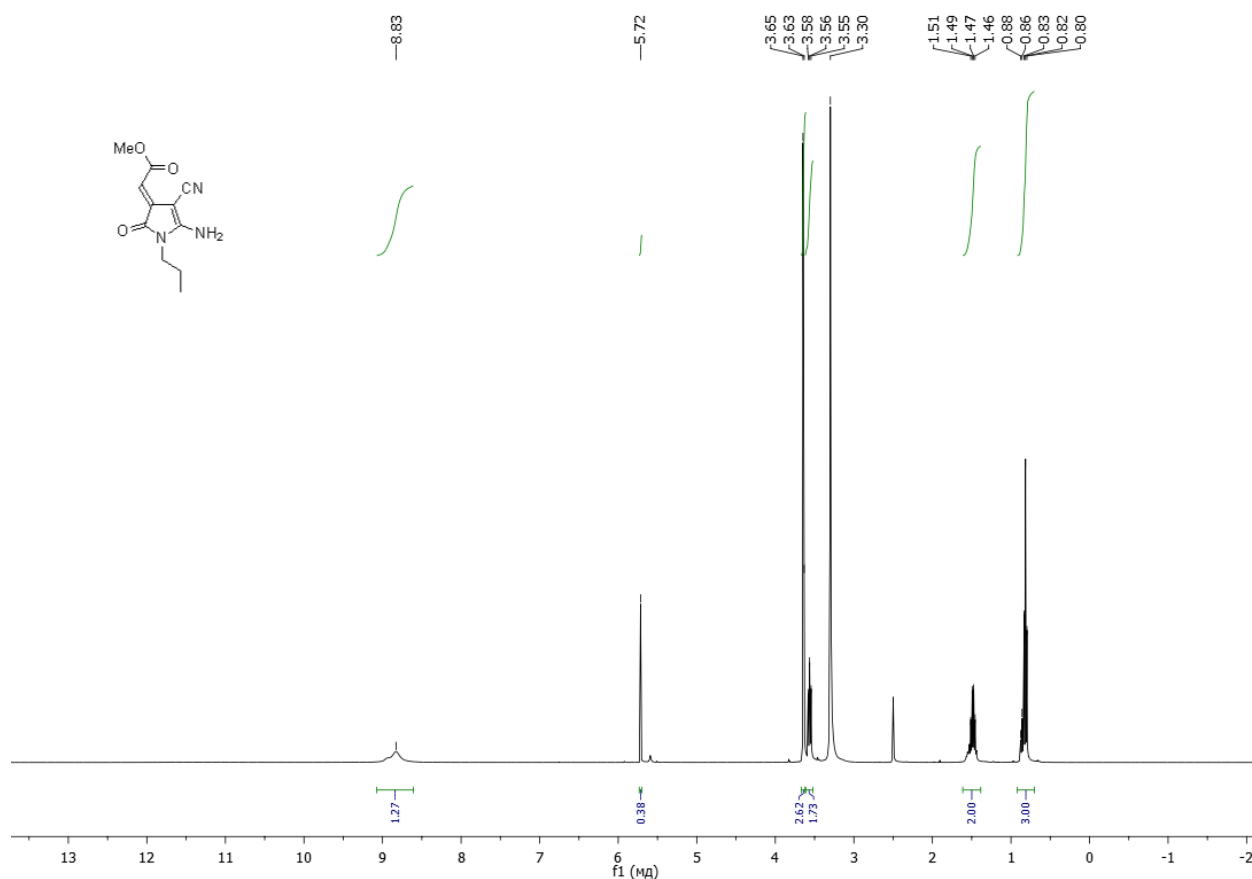

**Figure S25.**  $^{13}\text{C}$  NMR spectrum ( $\text{DMSO}-d_6$ ) of **5c**

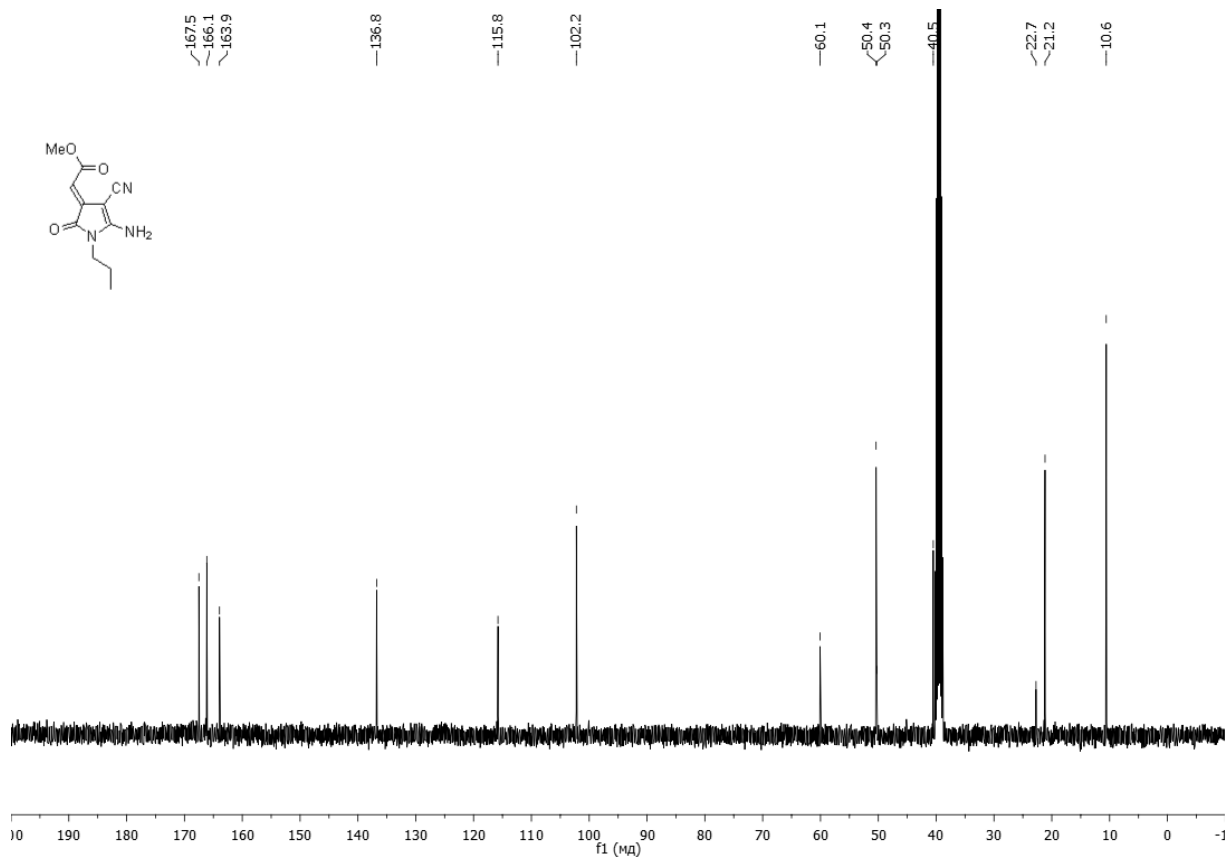

**Figure S26.**  $^1\text{H}$  NMR spectrum ( $\text{DMSO}-d_6$ ) of **5d**

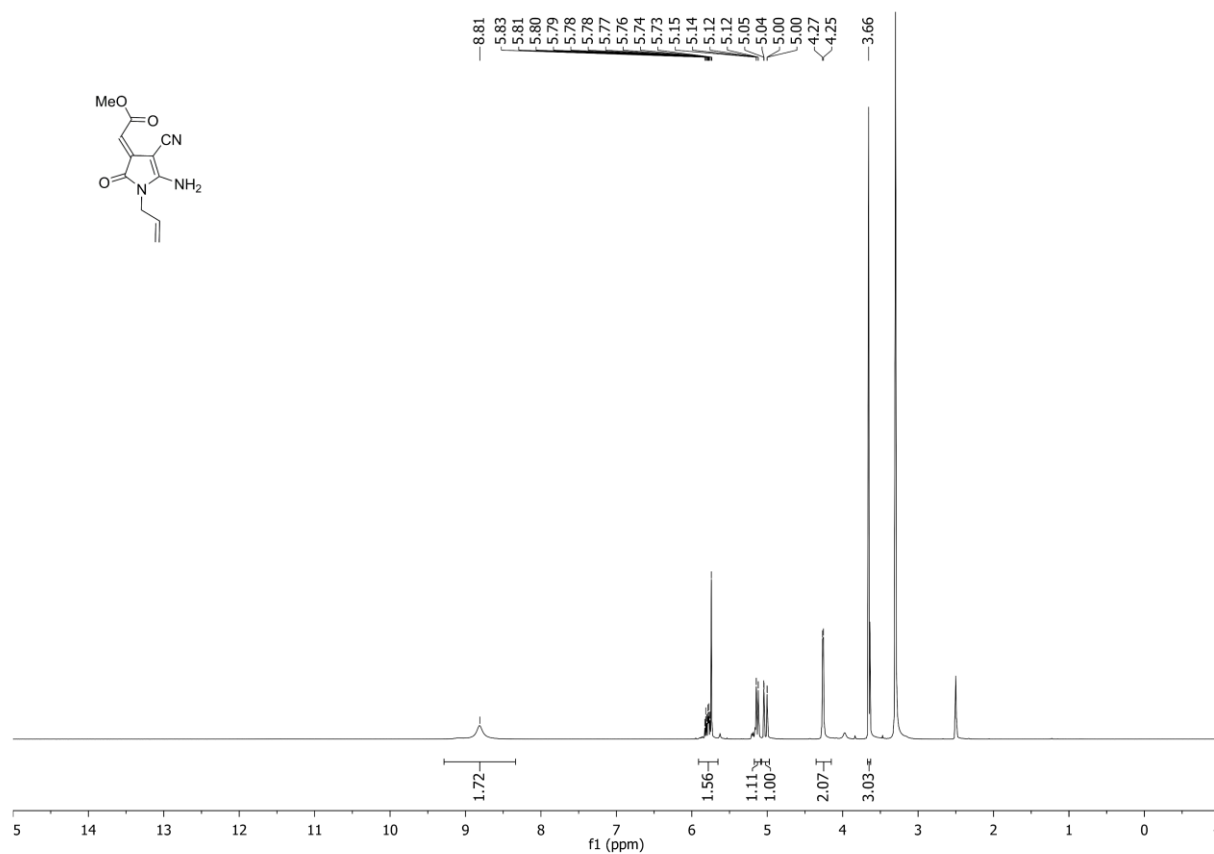

**Figure S27.**  $^{13}\text{C}$  NMR spectrum ( $\text{DMSO}-d_6$ ) of **5d**

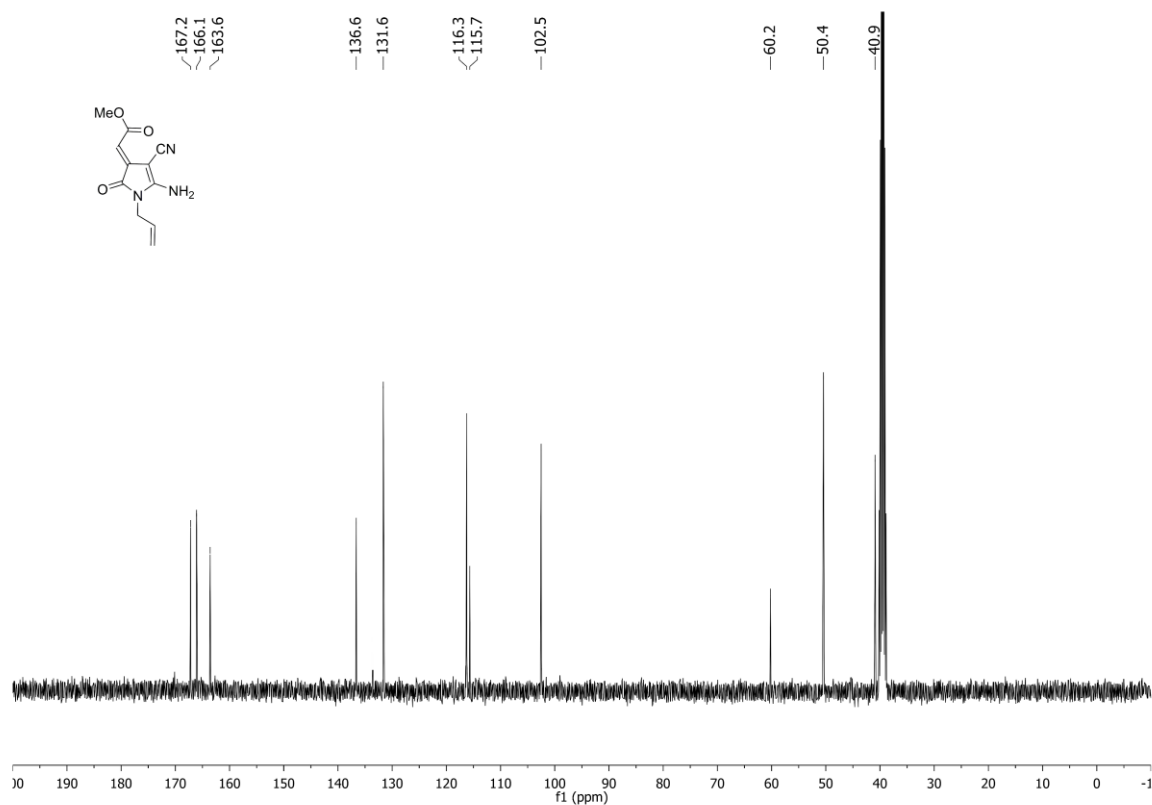

**Figure S28.**  $^1\text{H}$  NMR spectrum ( $\text{DMSO}-d_6$ ) of **5e**

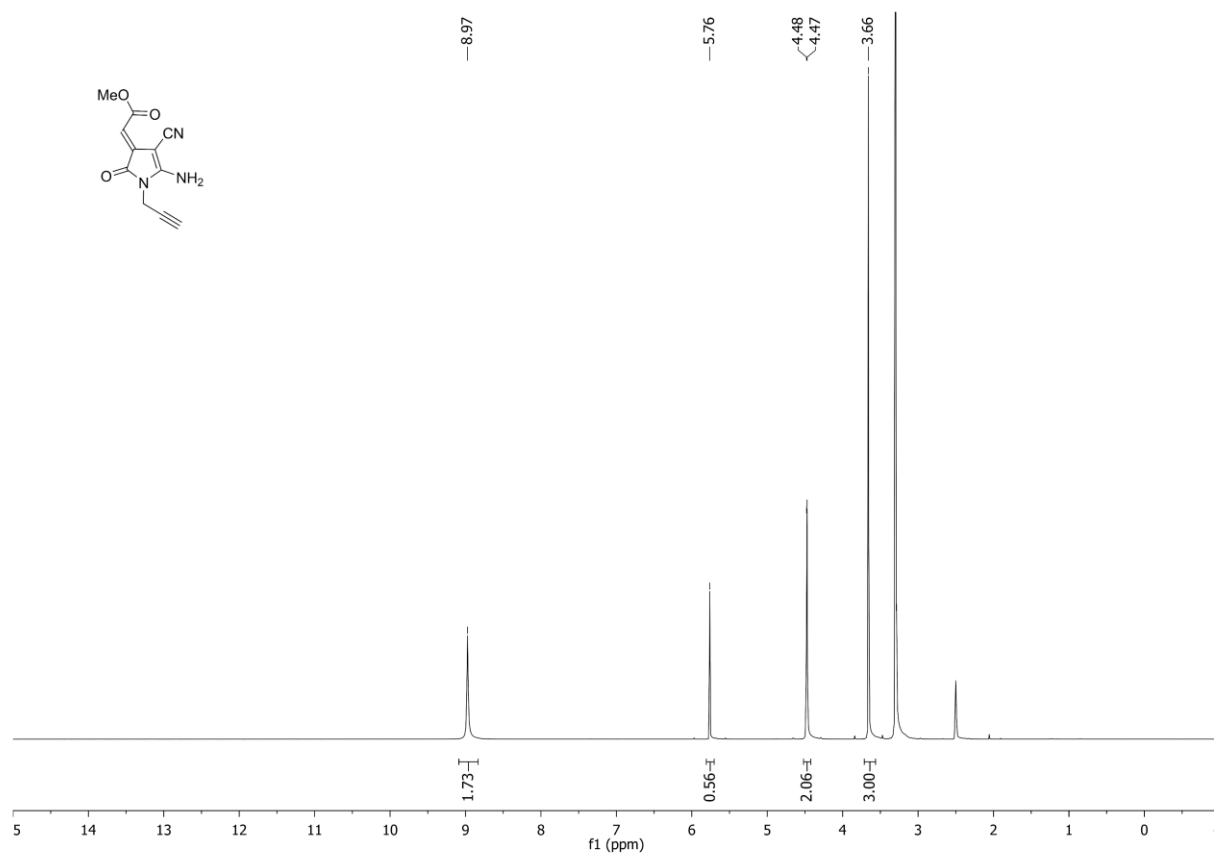

**Figure S29.**  $^{13}\text{C}$  NMR spectrum ( $\text{DMSO}-d_6$ ) of **5e**

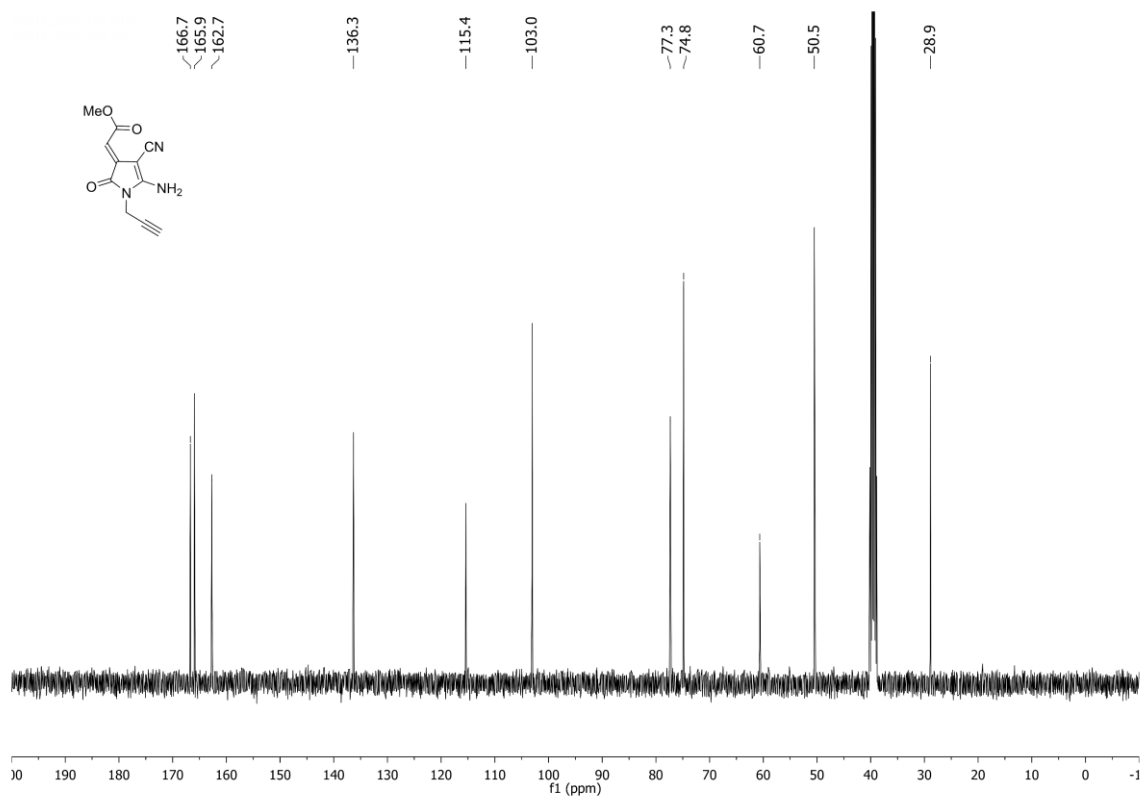



**Figure S30.**  $^1\text{H}$  NMR spectrum ( $\text{DMSO}-d_6$ ) of **5f**

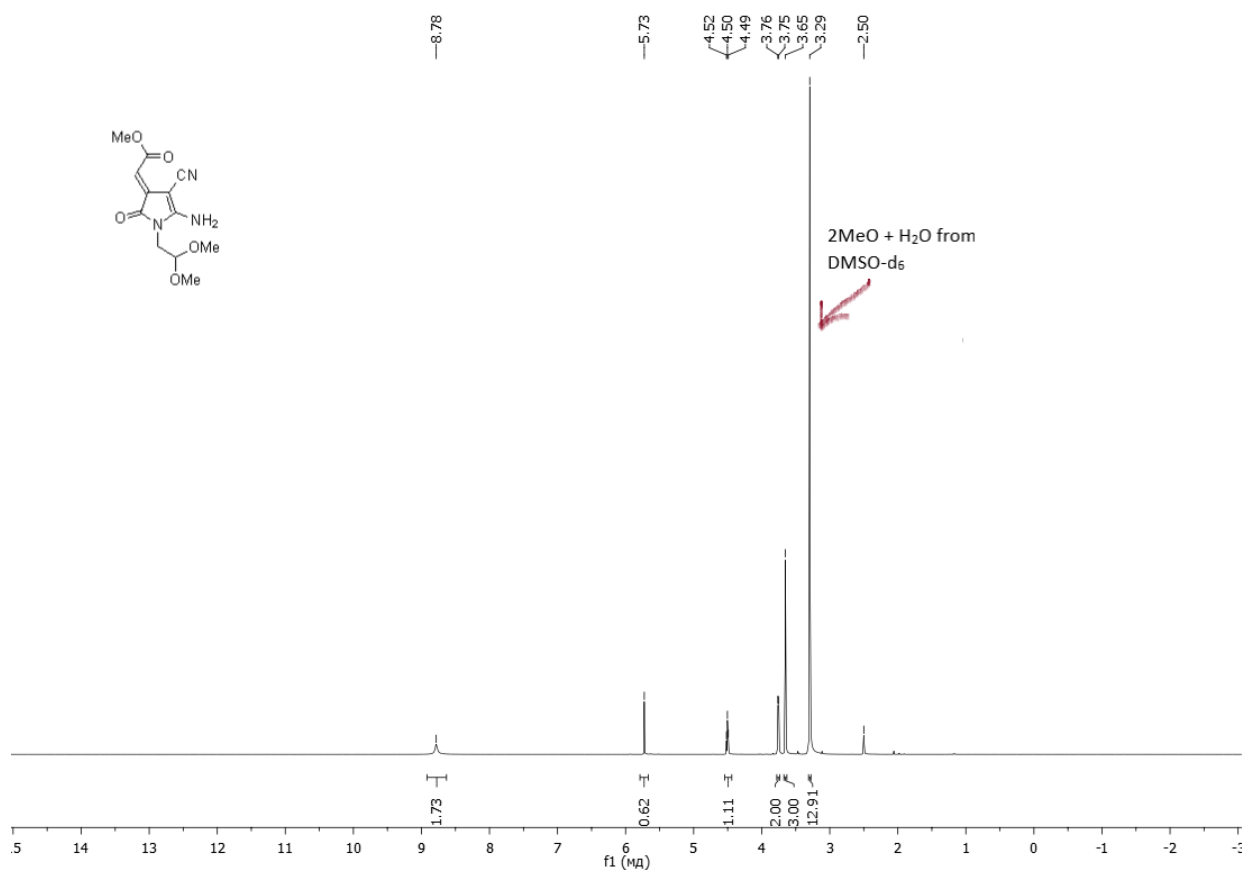

**Figure S31.**  $^{13}\text{C}$  NMR spectrum ( $\text{DMSO}-d_6$ ) of **5f**

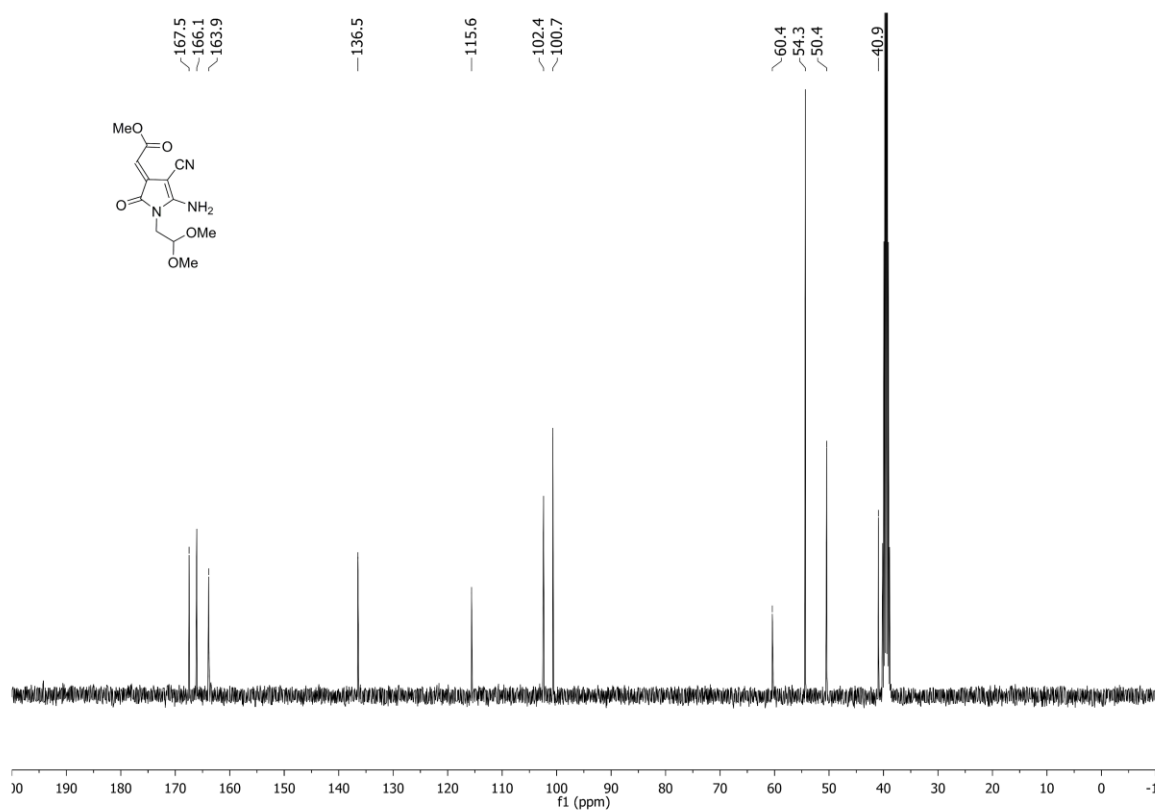

**Figure S32.**  $^1\text{H}$  NMR spectrum ( $\text{CDCl}_3$ ) of **6a**

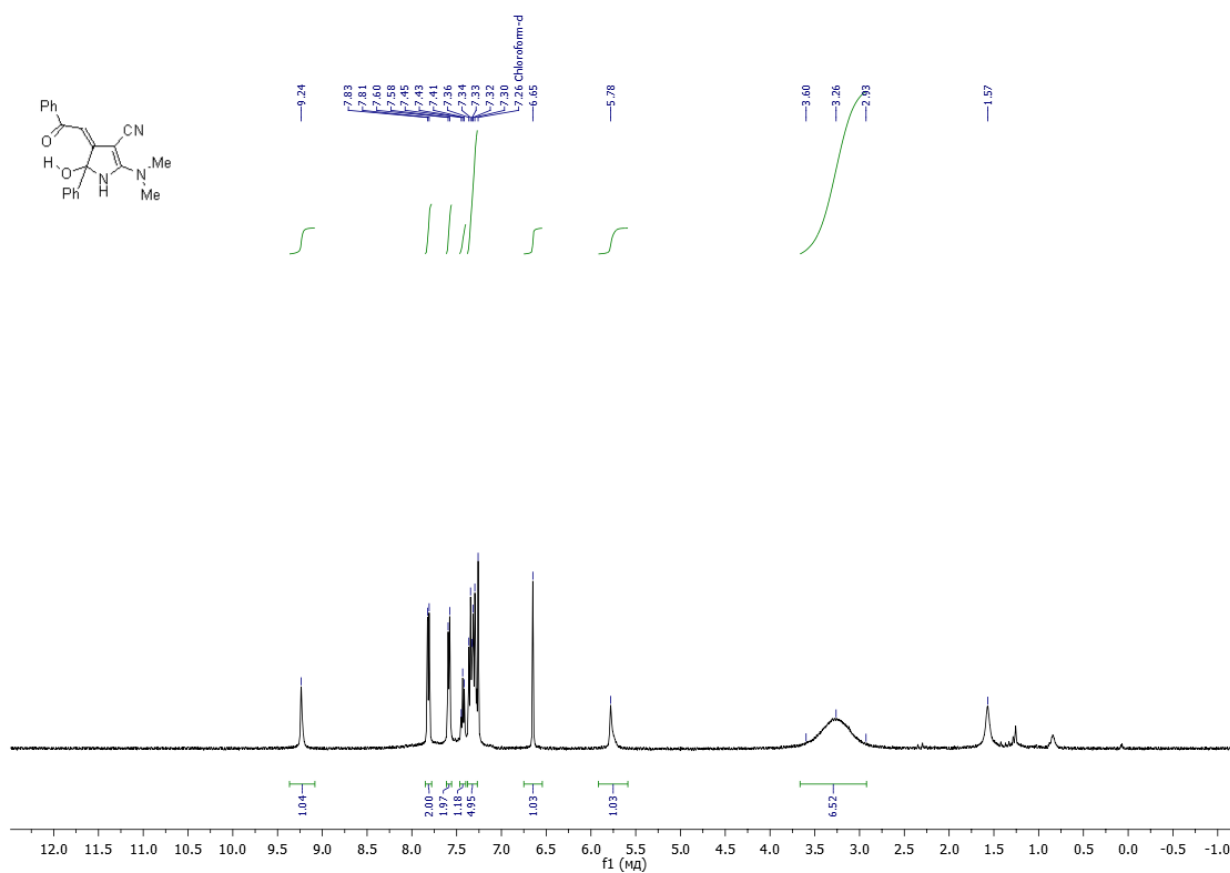

**Figure S33.**  $^{13}\text{C}$  NMR spectrum ( $\text{CDCl}_3$ ) of **6a**

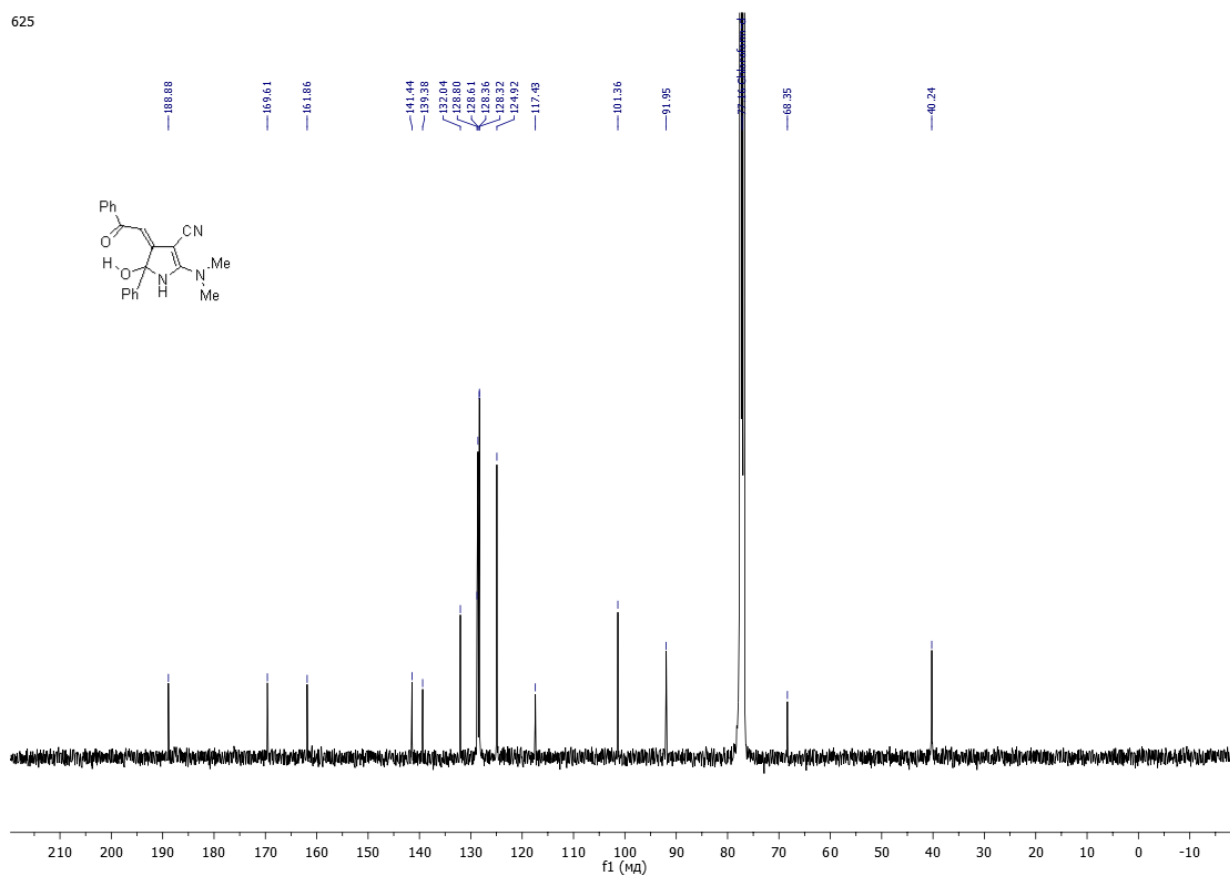

**Figure S34.**  $^1\text{H}$  NMR spectrum ( $\text{CDCl}_3$ ) of **6b**

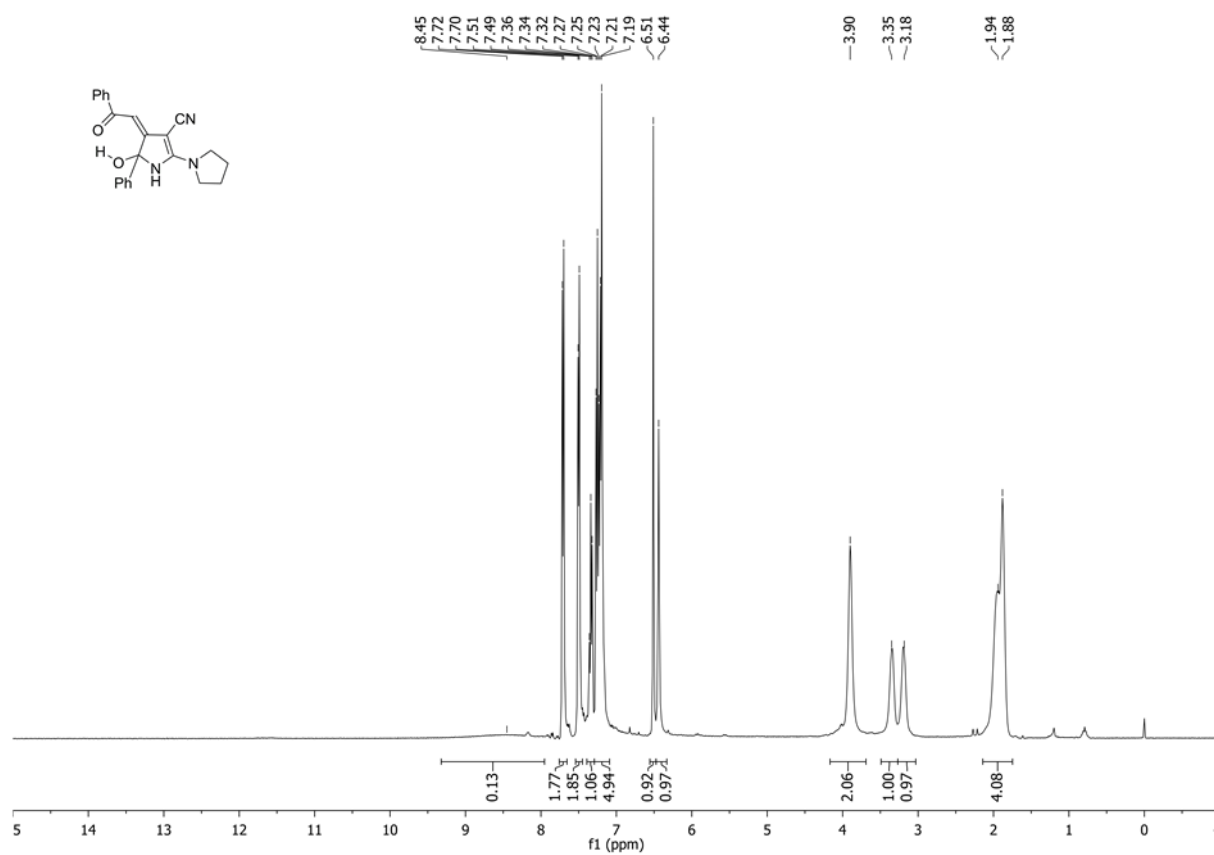

**Figure S35.**  $^{13}\text{C}$  NMR spectrum ( $\text{CDCl}_3$ ) of **6b**

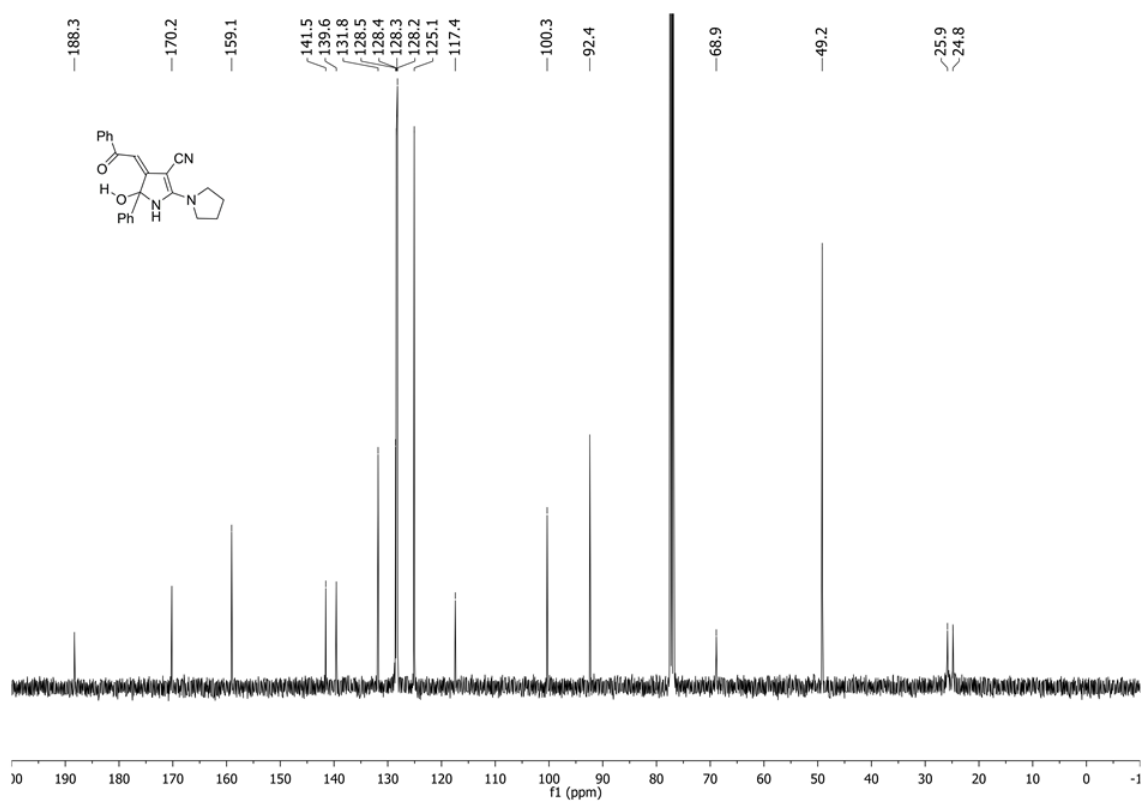

**Figure S36.**  $^1\text{H}$ - $^{13}\text{C}$  HSQC spectrum of **6b**

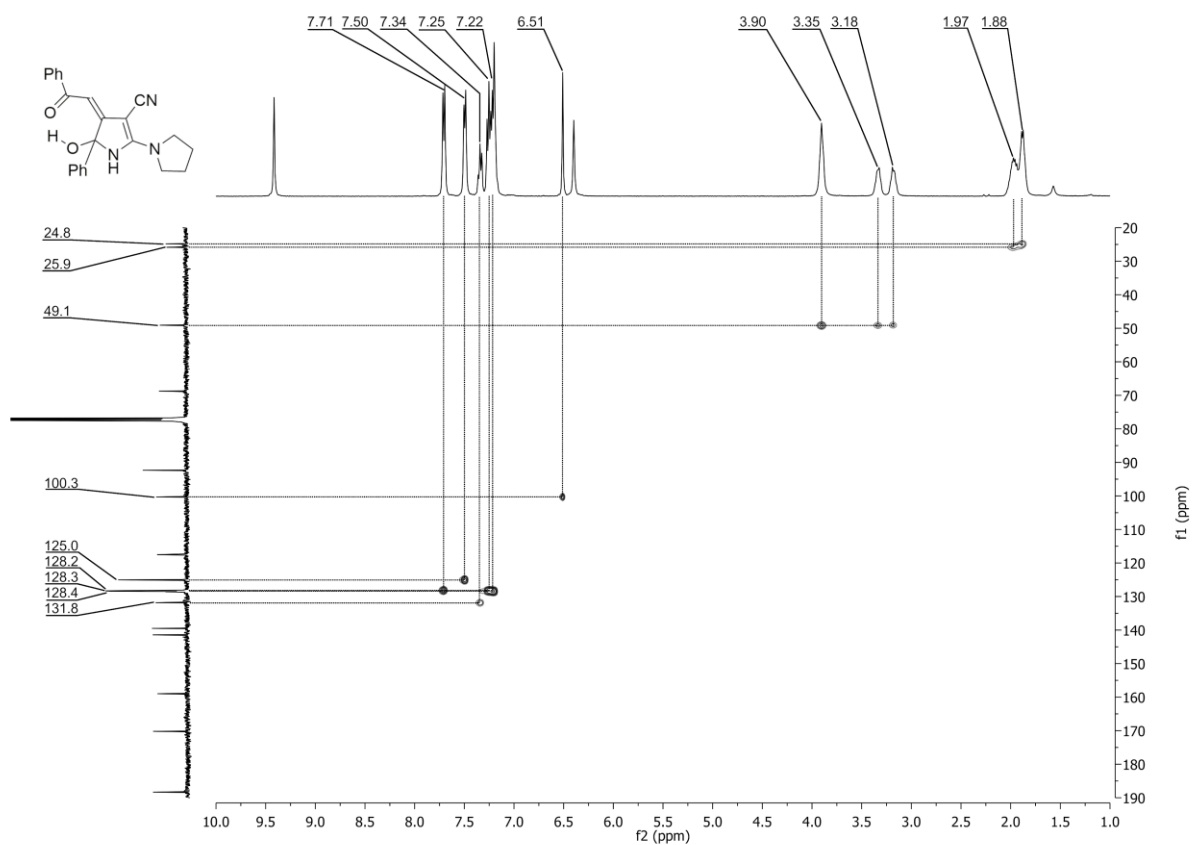

**Figure S37.**  $^1\text{H}$ - $^{13}\text{C}$  HMBC spectrum of **6b**

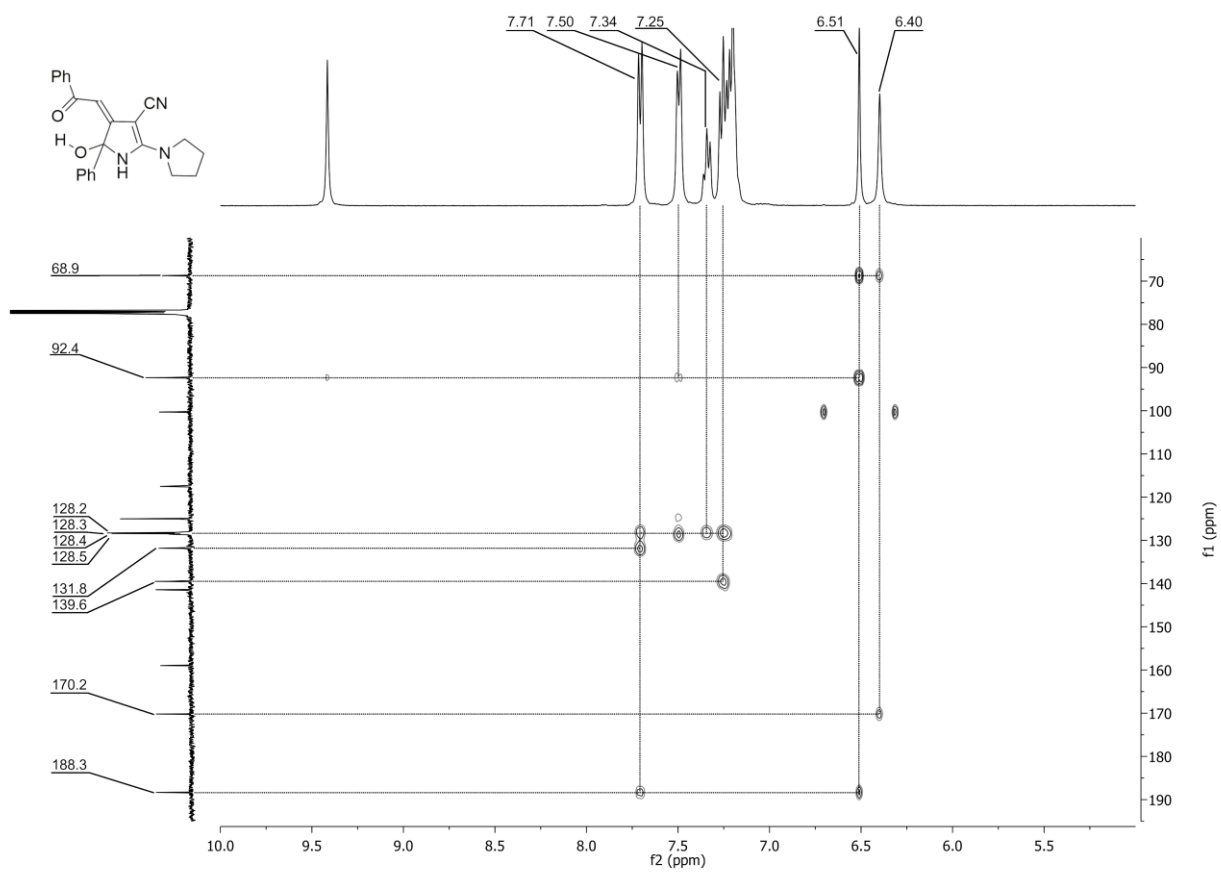

**Figure S38.**  $^1\text{H}$  NMR spectrum ( $\text{CDCl}_3$ ) of **6c**

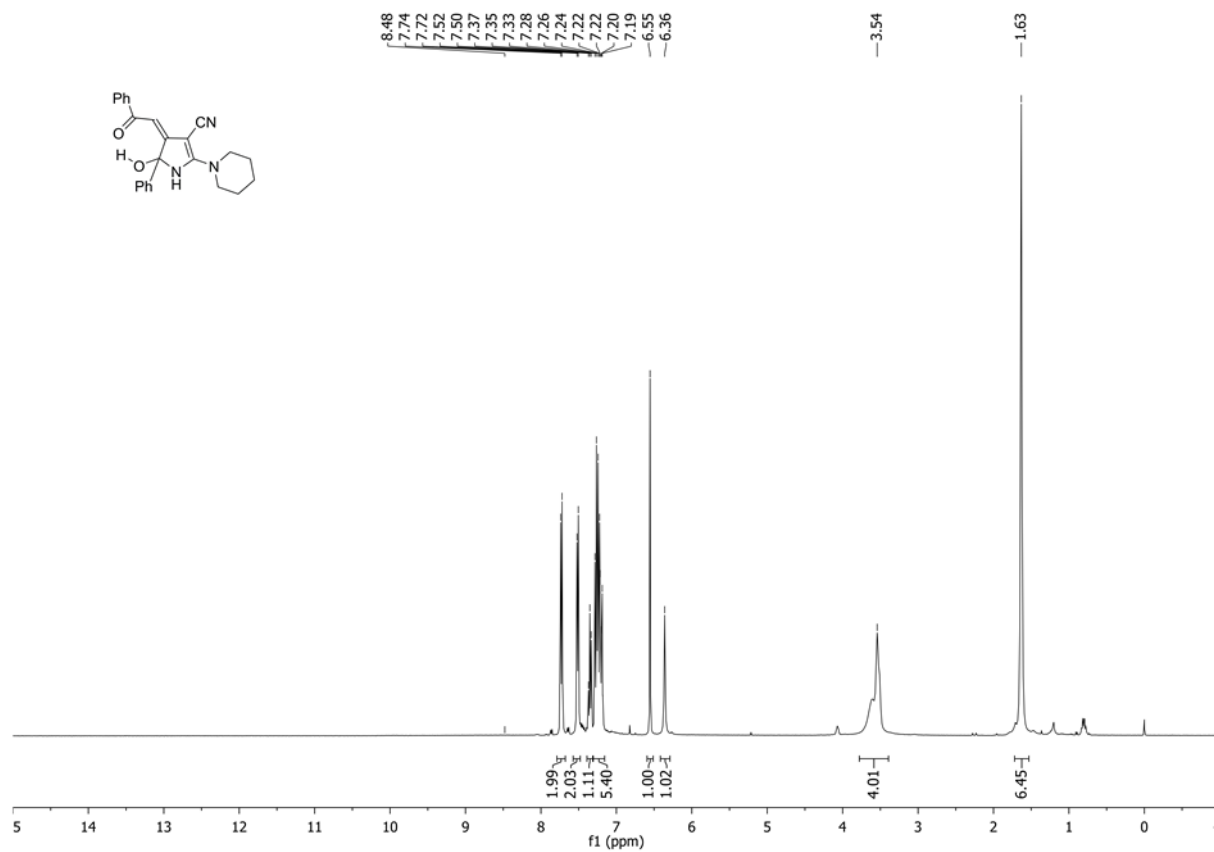

**Figure S39.**  $^{13}\text{C}$  NMR spectrum ( $\text{CDCl}_3$ ) of **6c**

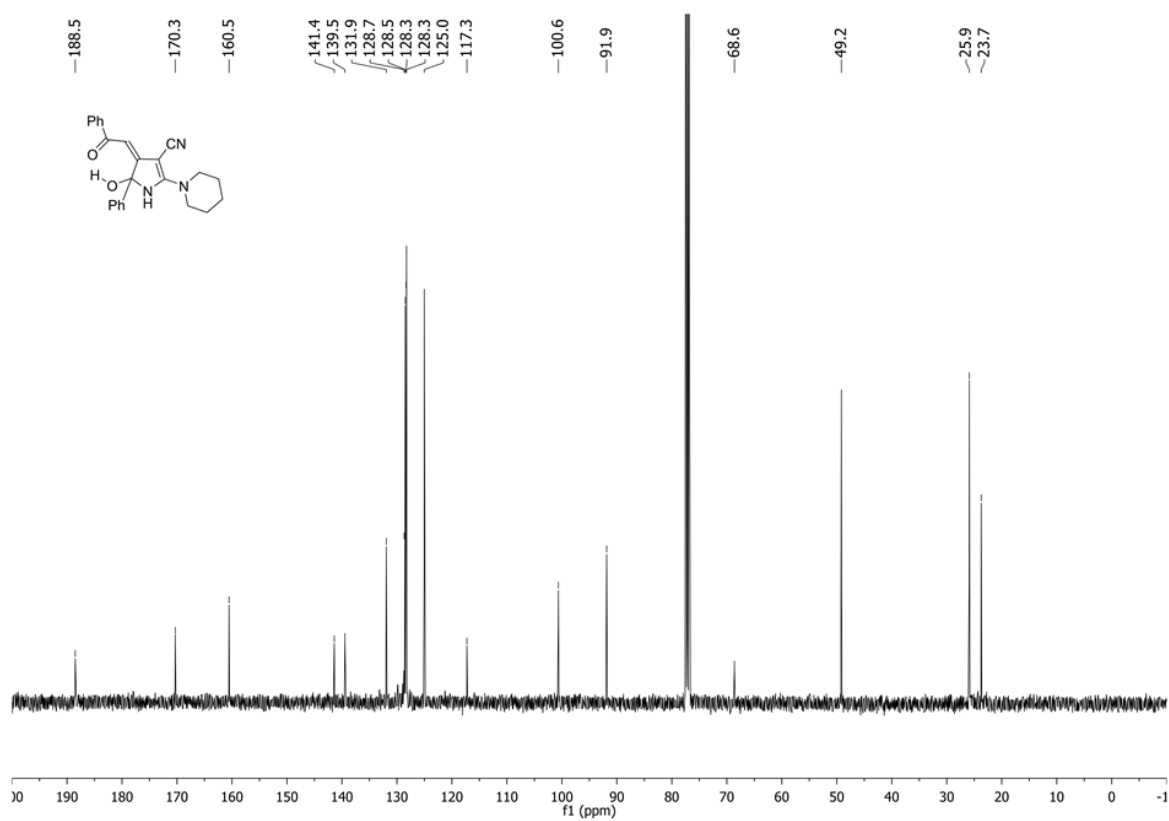

**Figure S40.**  $^1\text{H}$  NMR spectrum ( $\text{CDCl}_3$ ) of **6d**

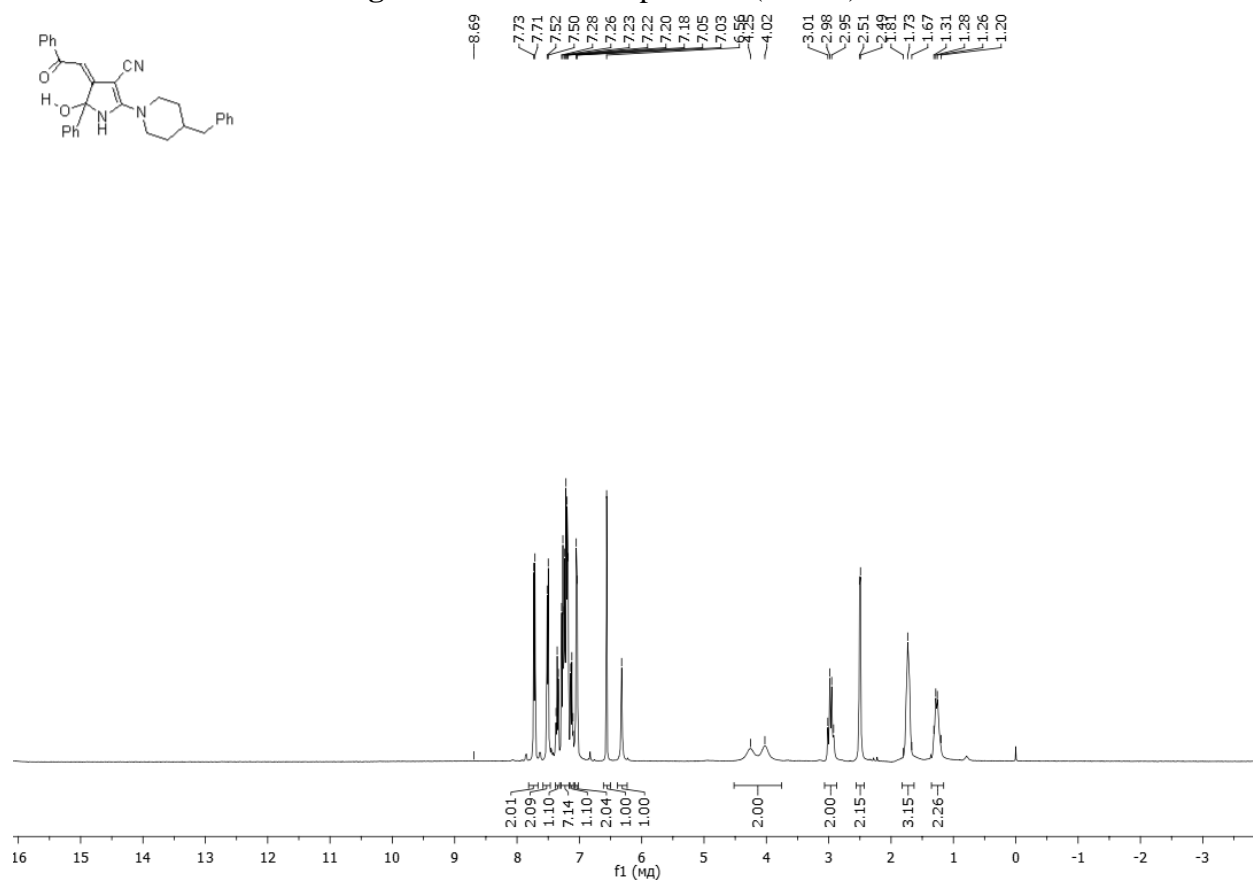

**Figure S41.**  $^{13}\text{C}$  NMR spectrum ( $\text{CDCl}_3$ ) of **6d**

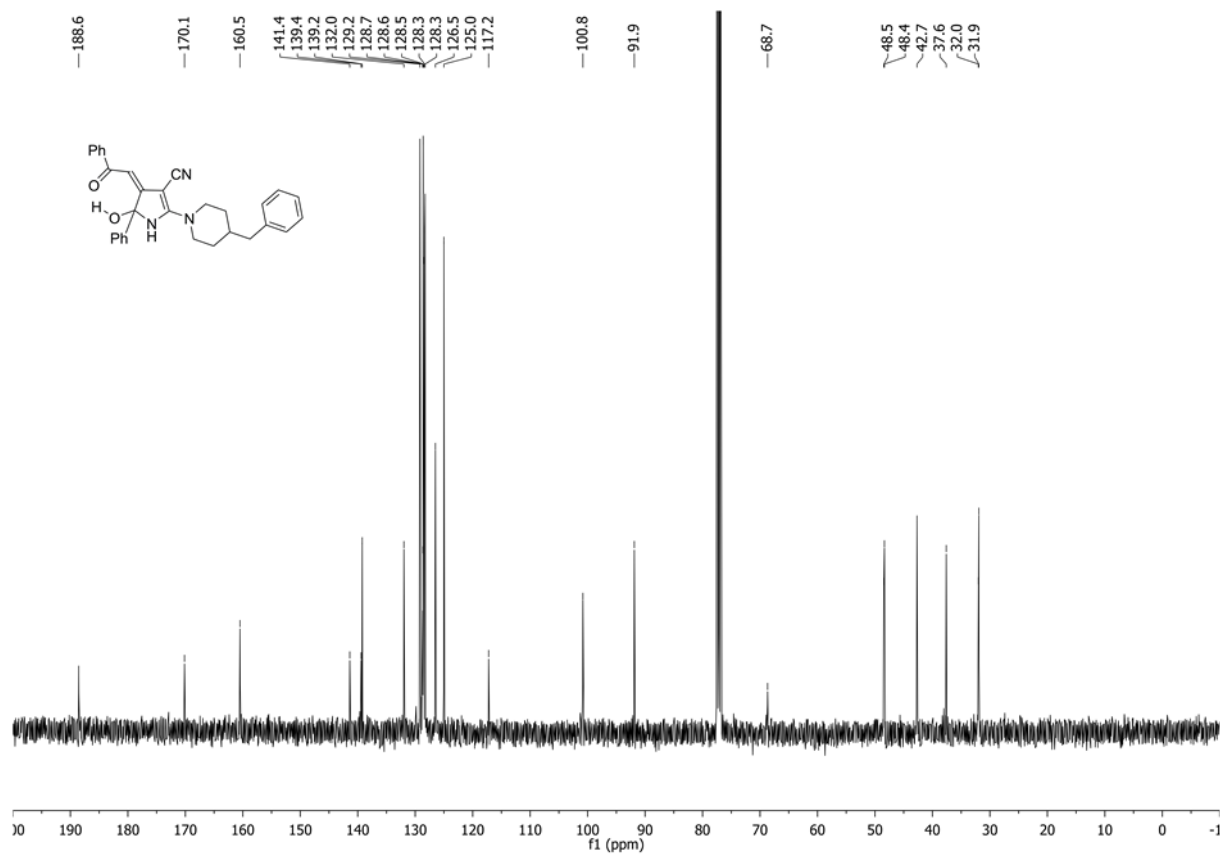

**Figure S42**  $^1\text{H}$  NMR spectrum ( $\text{CDCl}_3$ ) of **6e**

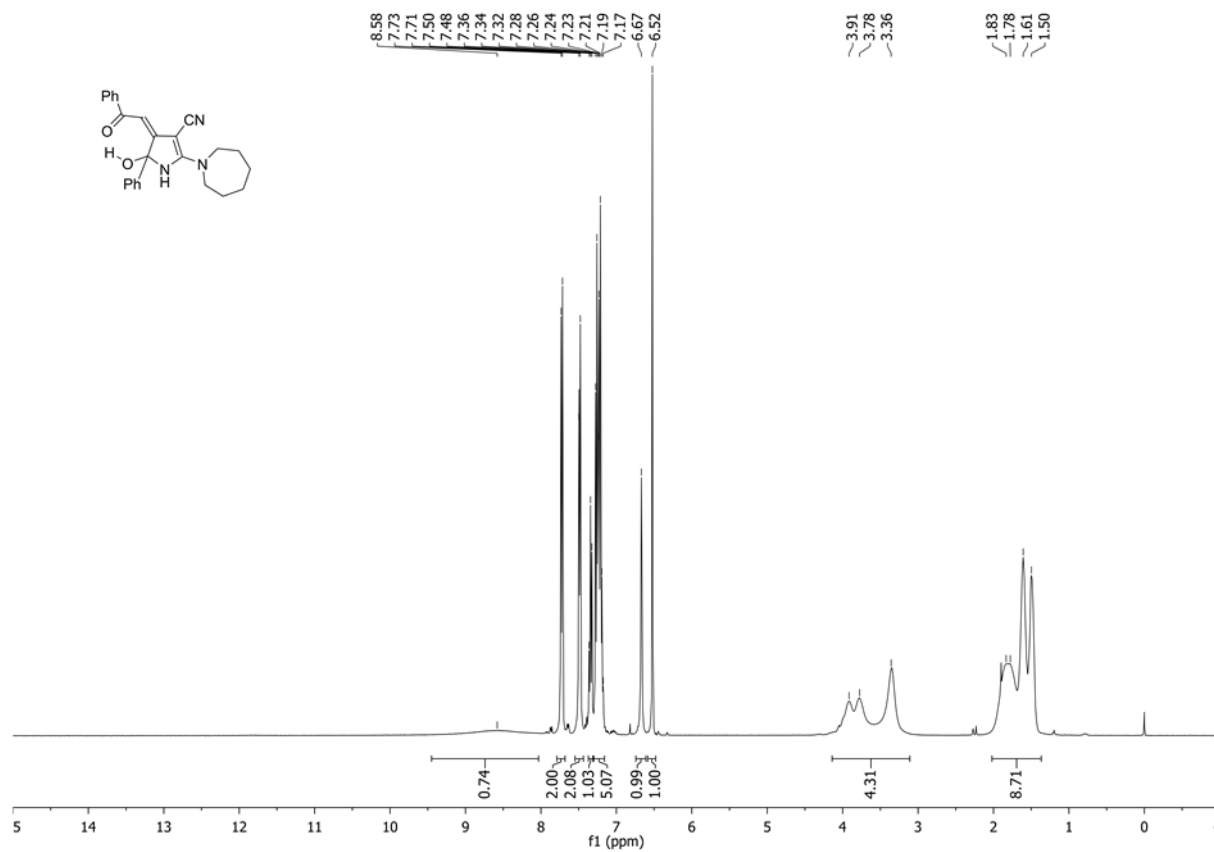

**Figure S43**  $^{13}\text{C}$  NMR spectrum ( $\text{CDCl}_3$ ) of **6e**

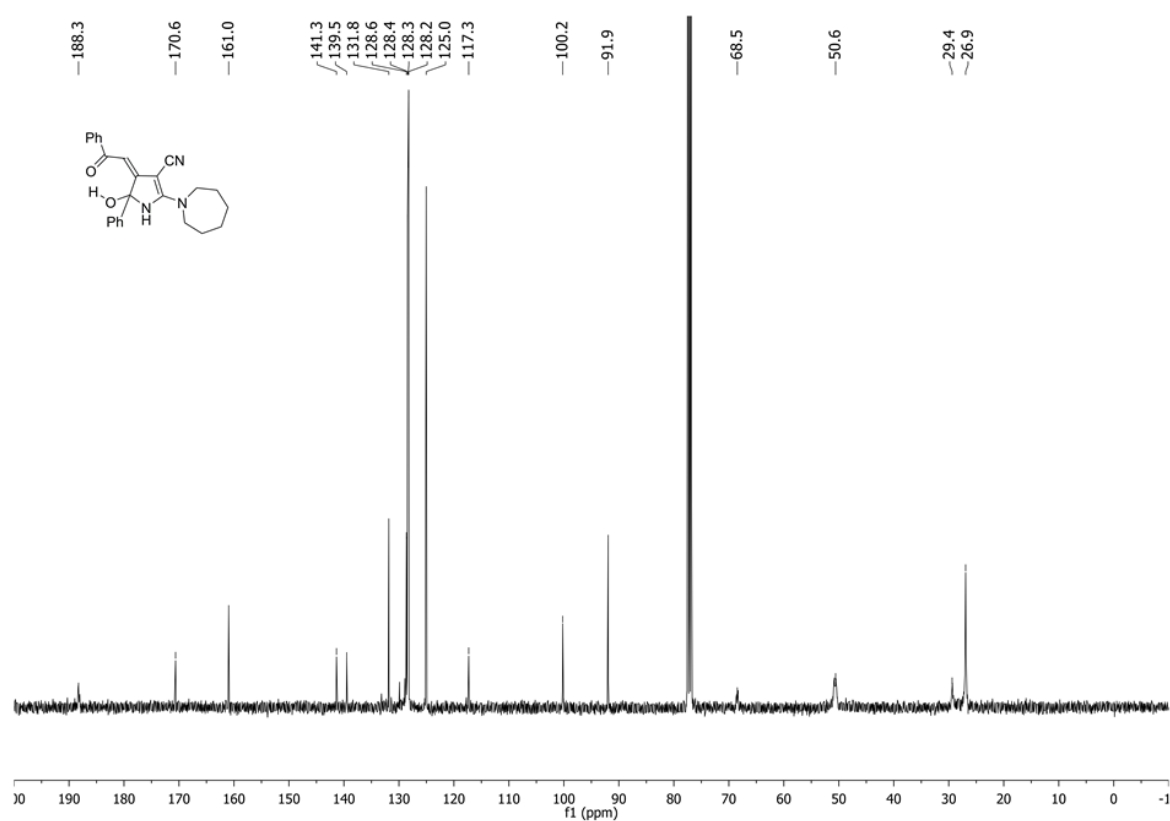

**Figure S44**  $^1\text{H}$  NMR spectrum ( $\text{CDCl}_3$ ) of **6f**

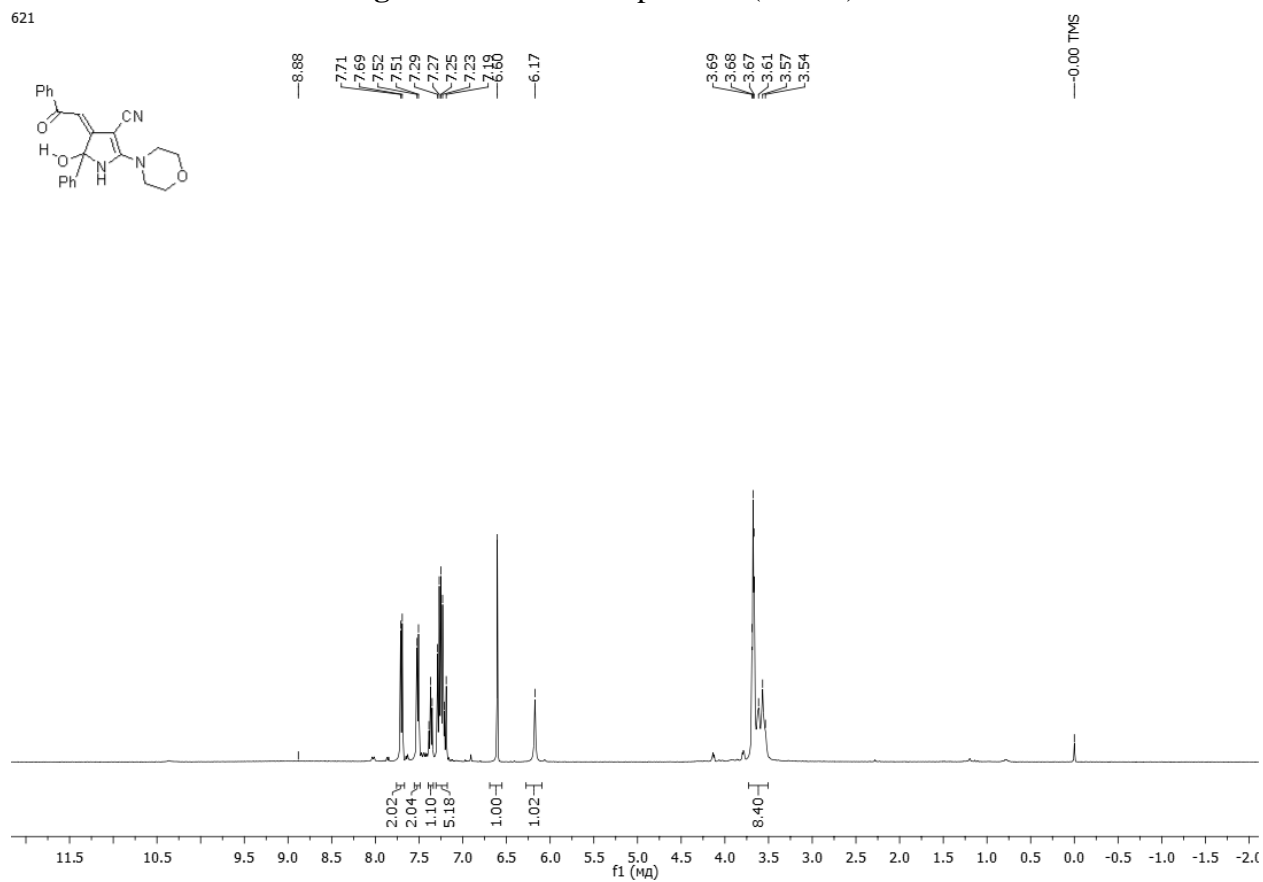

**Figure S45**  $^{13}\text{C}$  NMR spectrum ( $\text{CDCl}_3$ ) of **6f**

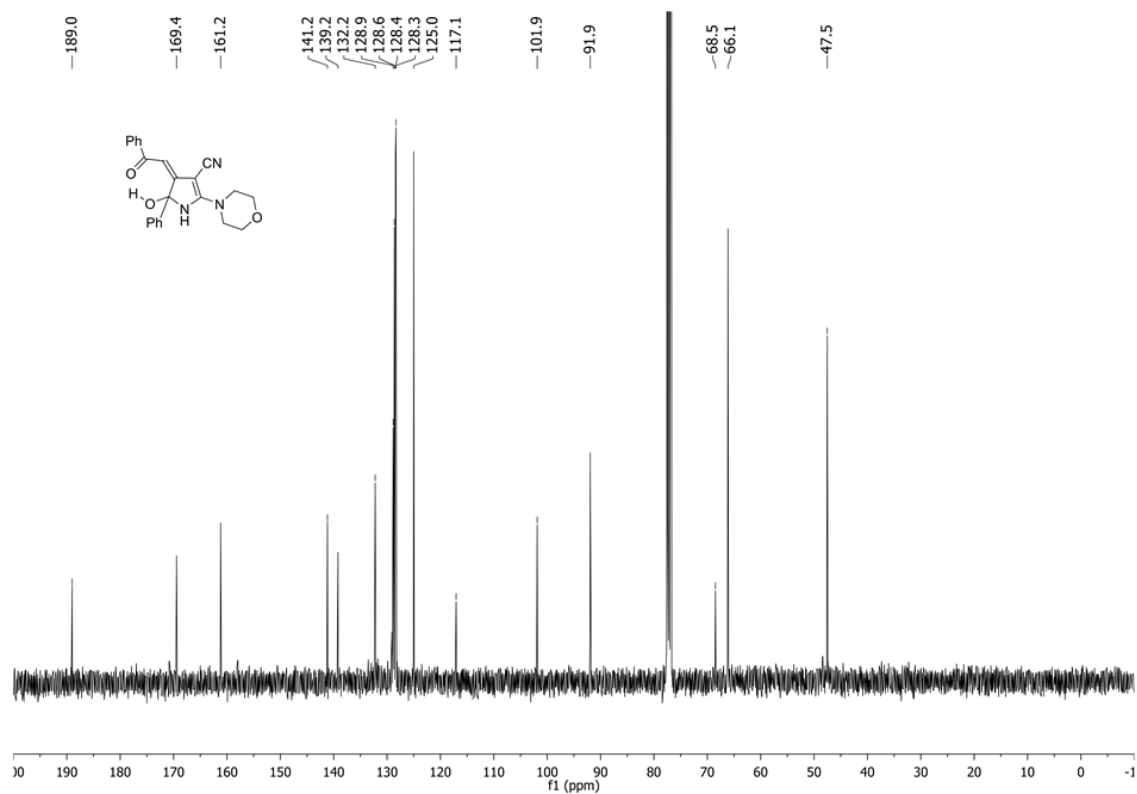



**Figure S46**  $^1\text{H}$  NMR spectrum ( $\text{CDCl}_3$ ) of **6g**

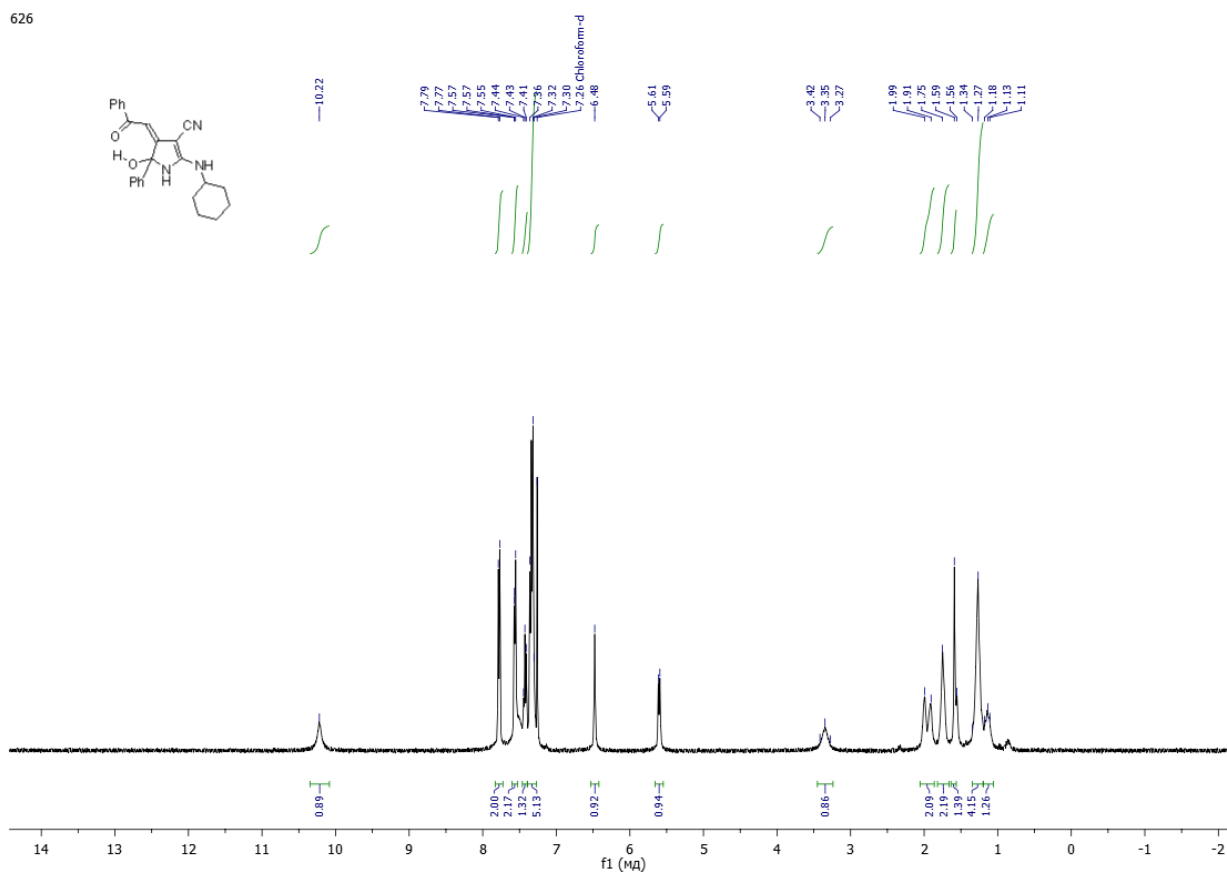

**Figure S47**  $^{13}\text{C}$  NMR spectrum ( $\text{CDCl}_3$ ) of **6g**

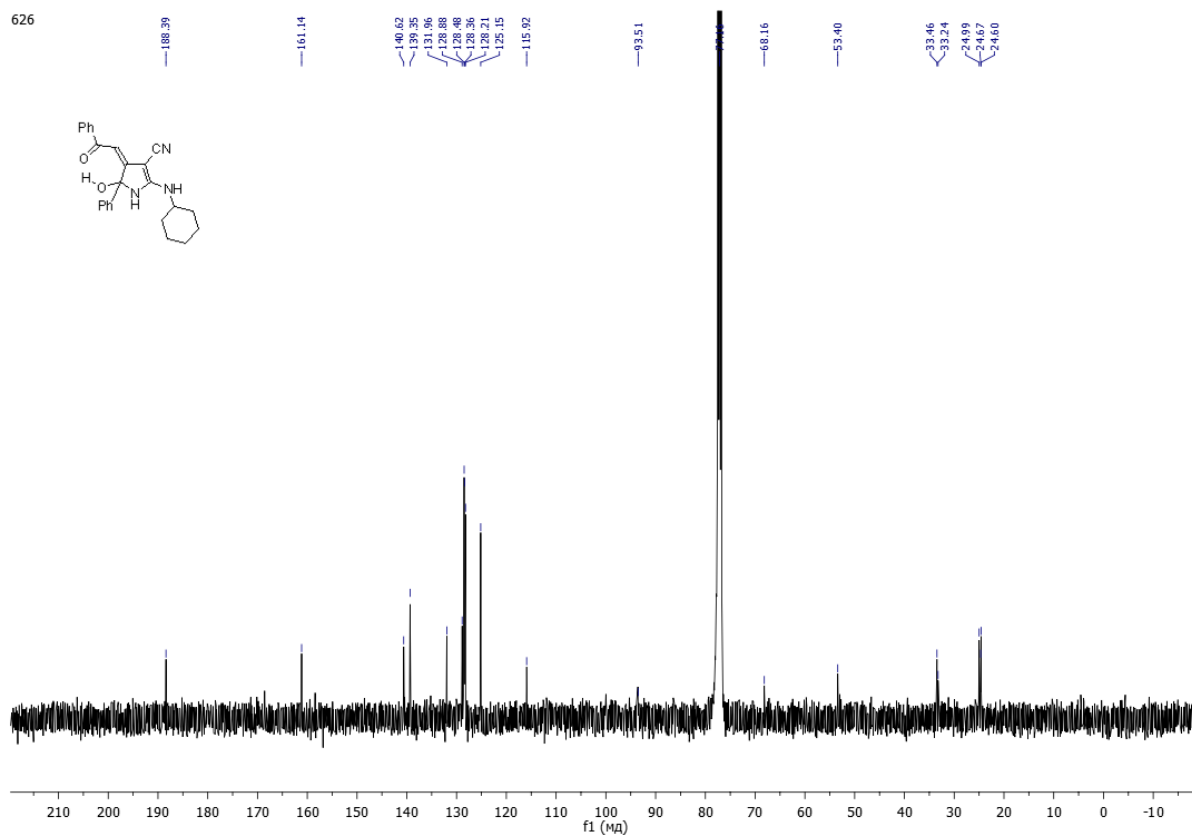

**Figure S48**  $^1\text{H}$  NMR spectrum ( $\text{CDCl}_3$ ) of **7a**

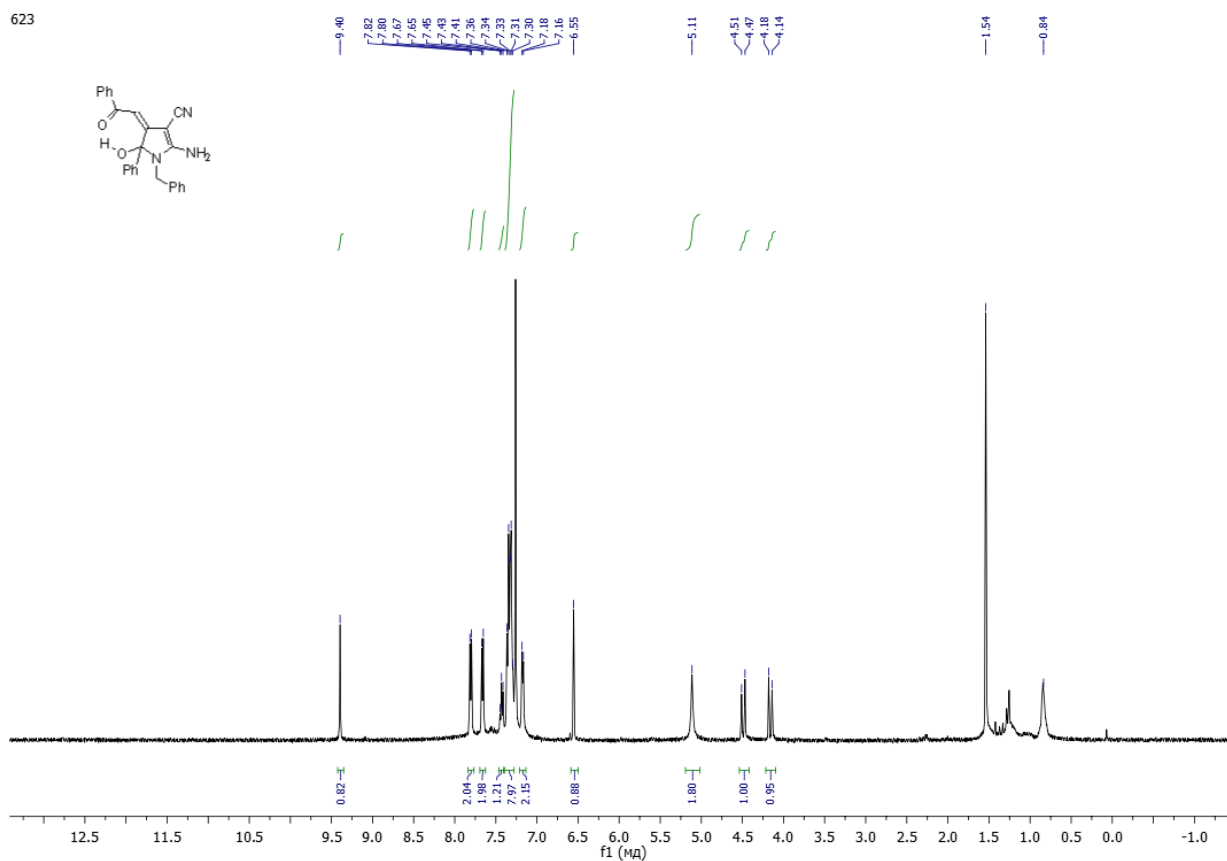

**Figure S49**  $^1\text{H}$  NMR spectrum ( $\text{CDCl}_3$ ) of **7b**

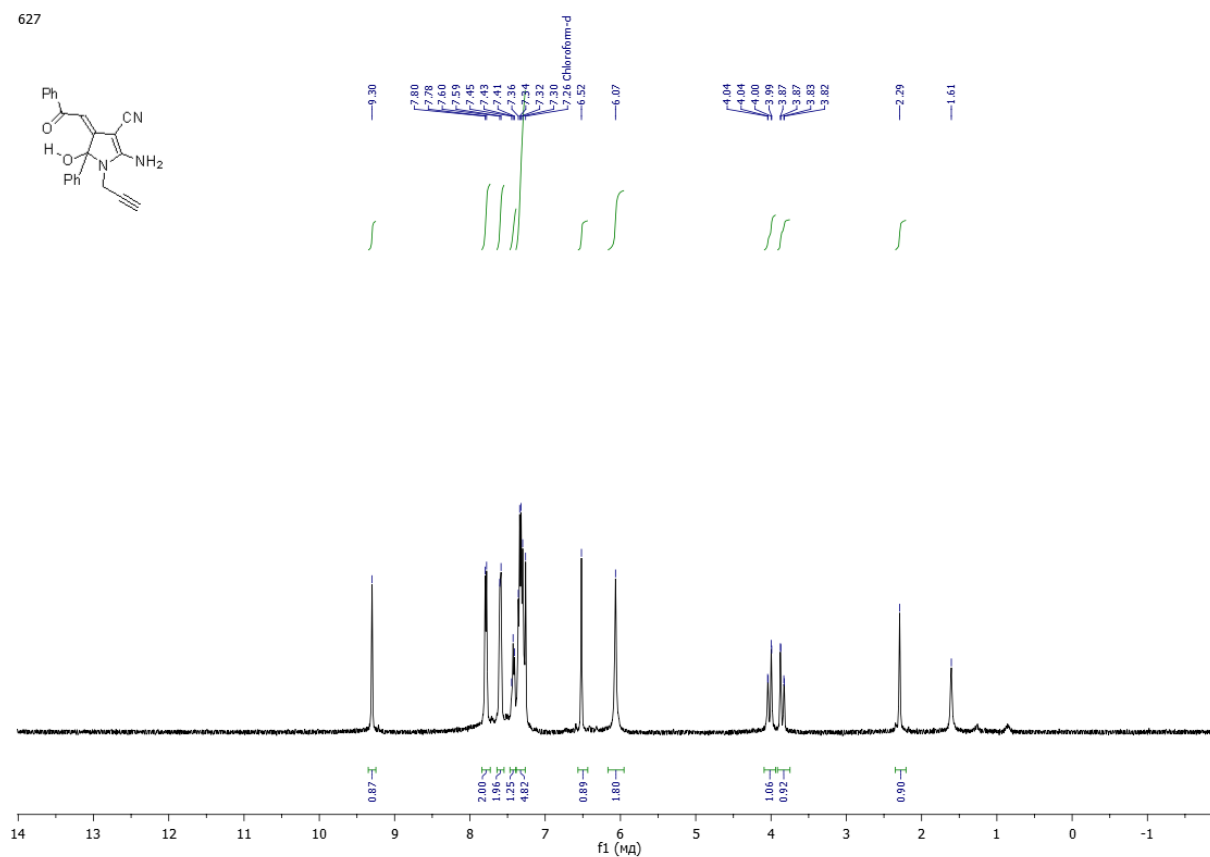

**Figure S50**  $^{13}\text{C}$  NMR spectrum ( $\text{CDCl}_3$ ) of **7b**

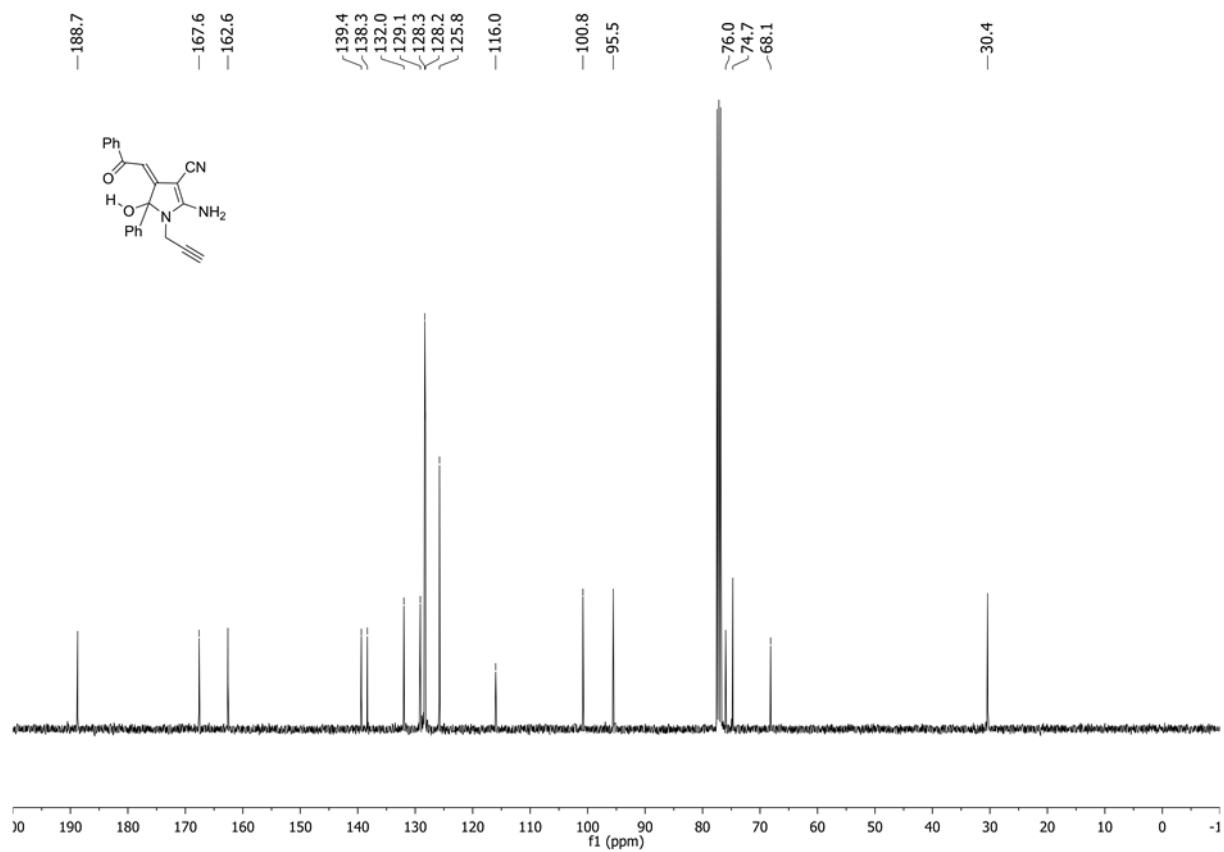

Supplement: s1 [file s1]
